# Supplementary material for: Identification of the HECT E3 ligase UBR5 as a regulator of MYC degradation using a CRISPR/Cas9 screen
Source: Sci Rep. 2020 Nov 18;10:20044. doi: 10.1038/s41598-020-76960-z (PMC7676242; doi:10.1038/s41598-020-76960-z)
Supplement: Supplementary file 1 — Supplementary Table 1. [file 41598_2020_76960_MOESM1_ESM.xlsx]

## Sheet: Sheet1
Supplementary table 1: A comprehensive list of the median LogFC score of the genes included in the library and the according RSA values represented as average LogP RSA score in high and low GFP expressing cells on day 7 and day 14 post-infection
	Median (LogFC) [Average of med.logFC]				RSA (stabilizer) [Average of LogP RSA score]
	HIGH vs Unsorted		LOW vs Unsorted		HIGH vs Unsorted		LOW vs Unsorted
Gene Name	Day 7	Day 14	Day 7	Day 14	Day 7	Day 14	Day 7	Day 14
ABTB1	0.008	0.143	-0.039	0.084	-0.67	-1.56	-1.349	-1.208
ABTB2	0.008	0.086	0.08	-0.05	-0.408	-1.023	-0.769	-0.6
ADGRA3	-0.08	0.058	0.041	0.074	-0.43	-2.322	-0.68	-1.253
ADGRE2	-0.097	-0.145	0.571	0.304	-0.778	-0.075	-8.76	-4.425
ADORA1	-0.088	-0.057	0.023	0.134	-0.282	-0.899	-1.292	-1.616
AGER	-0.023	-0.064	0.327	0.039	-0.707	-1.394	-2.839	-1.354
AKTIP	-0.185	-0.155	0.074	0.1	-0.199	-0.272	-1.6	-1.563
AMBRA1	0.361	0.299	-0.283	-0.438	-2.577	-3.426	-0.297	-0.076
AMFR	-0.296	-0.063	0.038	0.006	-0.076	-0.374	-0.853	-0.67
AMOT	0.182	-0.061	-0.079	-0.022	-1.262	-0.847	-0.703	-0.569
ANAPC1	0.092	-0.468	0.108	0.018	-1.246	-0.632	-1.763	-0.573
ANAPC10	0.142	0.185	0.066	0.054	-1.434	-2.752	-1.573	-2.016
ANAPC11	0.318	0.031	-0.061	-0.138	-3.847	-1.571	-1.005	-1.176
ANAPC2	-0.351	-0.02	-0.231	0.158	-0.798	-1.811	-1.889	-1.408
ANAPC4	0.082	0.222	0.151	-0.079	-1.274	-2.277	-2.699	-1.839
ANAPC5	-0.118	0.036	0.17	0.121	-0.669	-2.116	-2.187	-2.067
ANAPC7	-0.142	-0.242	0.186	0.184	-0.168	-0.221	-1.839	-1.719
ANKFY1	0.478	-0.15	-0.042	0.031	-3.481	-0.124	-0.886	-1.128
ANKIB1	0.068	-0.067	0.171	0.032	-1.111	-1.006	-1.556	-1.25
ANKRD31	-0.14	-0.043	0.201	0.038	-0.4	-1.538	-2.145	-1.989
AP4E1	0.198	0.162	-0.179	-0.133	-1.384	-1.843	-0.657	-0.683
AQP5	0.061	0.033	-0.045	0.097	-0.803	-0.795	-0.925	-1.032
AREL1	0.37	-0.063	-0.06	-0.03	-3.467	-0.404	-0.321	-0.724
ARIH1	0.072	-0.067	0.046	0.187	-1.92	-1.682	-1.379	-1.636
ARIH2	0.044	0.158	-0.237	-0.074	-1.181	-1.595	-0.132	-0.637
ARMC5	0.188	0.352	-0.802	-0.235	-1.472	-4.81	-0.025	-0.345
ARPP21	-0.072	0.015	0.03	0.009	-0.674	-1.499	-0.682	-0.769
ASB1	-0.033	-0.085	-0.179	0.013	-0.347	-0.733	-1.009	-0.659
ASB10	-0.11	-0.01	-0.165	0.044	-0.552	-0.572	-0.186	-1.03
ASB11	0.099	0.148	0.06	-0.049	-1.572	-1.325	-1.1	-0.717
ASB12	0.134	-0.072	-0.259	-0.039	-3.473	-0.389	-0.304	-0.691
ASB13	-0.057	-0.235	0.05	-0.055	-1.001	-0.152	-2.065	-0.512
ASB14	-0.099	-0.029	-0.096	-0.064	-0.139	-1.167	-0.416	-0.605
ASB15	0.132	-0.071	0.135	-0.003	-1.208	-0.27	-1.668	-0.612
ASB16	0.282	0.267	-0.209	-0.157	-2.471	-2.654	-0.648	-1.606
ASB17	0.033	-0.027	0.103	-0.055	-0.546	-0.468	-1.38	-0.788
ASB18	-0.23	-0.078	-0.068	0.017	-0.082	-0.522	-0.636	-0.806
ASB2	0.081	-0.06	-0.059	-0.073	-1.066	-1.192	-0.678	-1.08
ASB3	-0.158	-0.062	-0.066	0.035	-0.386	-1.176	-0.543	-1.398
ASB4	-0.412	0.043	-0.12	0.202	-0.158	-0.682	-0.707	-2.483
ASB5	-0.092	-0.087	0.026	-0.017	-0.856	-1.303	-0.55	-2.024
ASB6	0.087	0.045	0.188	-0.059	-0.754	-0.818	-1.341	-0.239
ASB7	0.072	-0.134	0	0.103	-1.174	-0.539	-0.976	-1.012
ASB8	-0.101	-0.006	0.088	-0.007	-0.188	-0.388	-1.607	-1.039
ASB9	0.325	0.083	-0.002	-0.063	-4.123	-0.691	-0.885	-0.388
ASIC1	-0.011	0.017	0.099	0.08	-0.533	-1.792	-1.129	-1.241
ASNSD1	-0.272	-0.074	0.149	0.167	-0.124	-1.015	-1.466	-2.03
ATG12	0.002	-0.071	-0.041	0.046	-0.933	-0.694	-0.336	-1.095
ATG5	-0.066	-0.058	0.113	0.096	-0.708	-0.806	-3.14	-3.143
ATG9B	-0.104	0.145	0.114	0.04	-0.36	-1.198	-1.334	-0.783
ATP5PF	-0.285	0.079	-0.215	0.174	-0.698	-0.807	-0.429	-1.617
ATRX	-0.035	-0.109	-0.006	0.042	-0.425	-0.219	-0.881	-0.694
ATXN3	0.121	0.063	-0.043	-0.039	-2.833	-1.926	-0.648	-1.232
BABAM1	-0.159	-0.16	0.578	0.478	-0.194	-0.808	-5.382	-7.319
BABAM2	-0.149	0.013	-0.004	0.048	-0.222	-0.918	-0.984	-1.3
BACH1	-0.321	-0.023	-0.1	0.064	-0.183	-1.041	-1.026	-1.986
BACH2	0.161	-0.074	0.204	0.082	-1.383	-0.748	-1.682	-2.094
BAP1	0.438	0.476	-0.961	-0.722	-3.155	-4.291	-0.07	-0.042
BARD1	0.15	0.439	0.128	-0.344	-1.12	-3.496	-1.521	-0.95
BCAP29	-0.194	-0.12	0.161	0.011	-0.543	-0.3	-1.612	-1.057
BFAR	0.037	-0.017	-0.111	-0.026	-1.528	-0.736	-0.648	-0.822
BIRC2	-0.044	-0.158	0.02	-0.125	-1.132	-0.291	-0.838	-0.92
BIRC3	-0.093	0.029	-0.09	-0.195	-0.428	-1.451	-0.378	-0.317
BIRC7	0.228	0.186	-0.161	0.037	-1.767	-2.174	-0.386	-1.018
BIRC8	0.07	-0.061	0.11	0.113	-1.325	-0.414	-1.651	-1.898
BMI1	-0.305	-0.083	0.224	0.082	-0.289	-0.639	-2.043	-1.409
BRAP	-0.111	0.038	-0.224	-0.26	-0.525	-1.332	-0.623	-0.128
BRCA1	0.311	0.002	-0.118	-0.132	-3.038	-1.573	-0.824	-0.111
BRCC3	0.026	0.056	0.025	0	-1.254	-0.928	-0.971	-0.839
BRWD1	-0.221	-0.195	-0.007	-0.017	-0.138	-0.127	-1.223	-1.179
BRWD3	0.147	0.018	0.01	0.055	-1.608	-1.105	-0.962	-0.707
BTBD1	-0.068	0.025	-0.141	-0.151	-1.025	-0.782	-0.493	-0.421
BTBD10	-0.055	0.087	0.006	-0.107	-0.534	-0.905	-0.841	-0.504
BTBD11	0.079	-0.068	-0.017	0.047	-0.896	-0.225	-1.206	-0.983
BTBD16	-0.219	-0.324	0.144	0.012	-0.425	-0.202	-1.337	-0.569
BTBD17	0.167	0.011	-0.152	-0.129	-1.428	-1.115	-1.525	-1.408
BTBD18	0.243	0.072	-0.238	-0.14	-1.653	-0.773	-0.303	-0.495
BTBD19	-0.163	-0.024	-0.102	0.207	-0.313	-0.822	-0.377	-2.088
BTBD2	-0.175	-0.14	0.14	0.196	-0.407	-0.195	-1.238	-2.076
BTBD3	-0.083	-0.123	0.105	0.139	-0.874	-0.218	-1.414	-2.113
BTBD6	0.167	0.07	0.028	-0.002	-1.685	-1.006	-0.511	-0.7
BTBD7	-0.009	-0.052	0.177	0.127	-1.344	-0.647	-2.173	-1.723
BTBD8	-0.096	-0.157	0.006	0.039	-0.199	-0.518	-1.01	-0.916
BTBD9	-0.234	-0.166	0.305	0.216	-0.152	-0.119	-2.71	-2.296
BTRC	0.117	0.045	0.067	-0.026	-1.307	-1.209	-1.409	-0.503
BUB3	-0.254	-0.012	-0.239	-0.026	-0.837	-1.039	-1.381	-1.48
C1orf68	-0.284	-0.026	0.045	0.033	-0.379	-0.243	-1.148	-1.383
C2orf15	-0.065	-0.068	0.146	0.001	-0.696	-0.265	-1.557	-1.141
CAND1	0.196	0.224	0.076	-0.114	-1.458	-2.391	-0.765	-0.151
CAND2	-0.256	0.12	-0.109	0.045	-0.3	-1.08	-0.569	-1.36
CAVIN2	-0.211	-0.053	-0.013	-0.007	-0.235	-0.468	-0.74	-0.949
CBL	0.185	0.15	0.053	0.009	-1.714	-1.882	-0.805	-0.504
CBLB	0.022	-0.011	-0.102	-0.068	-0.964	-0.343	-0.713	-0.51
CBLC	-0.164	-0.288	0.254	0.251	-0.11	-0.073	-2.634	-3.953
CBLL1	0.167	0.052	-0.198	-0.152	-1.215	-1.036	-0.243	-0.454
CBLL2	0.043	0.028	-0.198	-0.003	-0.693	-0.741	-0.354	-0.528
CCDC9B	0.237	0.228	-0.163	-0.156	-4.419	-4.04	-0.482	-0.473
CCIN	-0.074	-0.1	0.129	0.195	-0.668	-0.383	-1.341	-1.727
CCNB1IP1	0.228	-0.083	-0.13	-0.131	-2.095	-0.377	-0.624	-0.101
CCNC	0.754	0.844	-0.997	-0.962	-6.645	-7.765	-0.06	-0.251
CCND1	0.082	0.077	-0.033	-0.127	-1.173	-1.624	-0.524	-0.813
CCNE1	-0.043	0.027	0.444	0.286	-0.652	-1.32	-6.356	-2.91
CCNE2	0.033	-0.028	-0.129	-0.131	-1.597	-0.832	-0.633	-0.482
CCNF	-0.218	-0.138	-0.027	-0.031	-0.585	-0.163	-0.422	-0.928
CDC16	-0.043	0.108	0.054	-0.054	-1.109	-1.31	-2.286	-0.283
CDC20	-0.32	-0.04	-0.228	-0.083	-1.092	-1.119	-1.418	-1.363
CDC23	-0.055	0.608	0.297	0.025	-3.071	-5.398	-2.746	-3.288
CDC34	-0.118	-0.09	0.297	0.384	-0.202	-0.586	-2.352	-5.217
CDCA7	0.069	-0.07	-0.012	-0.054	-1.208	-0.627	-0.865	-0.873
CDK2	-0.099	-0.043	0.099	-0.025	-0.519	-0.35	-1.886	-0.616
CDK4	-0.032	0.125	0.001	0.114	-1.222	-1.023	-0.442	-2.214
CDK6	-0.085	0.032	-0.076	0.021	-0.317	-2.231	-0.517	-1.932
CDK9	0.604	0.336	-0.654	-0.06	-7.045	-3.412	-0.019	-1.015
CDRT1	-0.123	-0.064	-0.181	-0.155	-0.49	-0.621	-0.19	-0.223
CDX4	0.24	0.068	0.149	-0.069	-2.124	-0.632	-1.932	-0.97
CEP152	0.211	0.171	0.168	-0.129	-1.511	-2.24	-1.393	-0.198
CES1	-0.068	0.04	0.109	-0.006	-0.41	-0.58	-1.759	-1.614
CGRRF1	0.15	0.005	-0.054	-0.059	-2.548	-1.656	-0.251	-1.097
CHFR	-0.177	-0.063	0.026	0.035	-0.749	-0.478	-0.896	-1.865
CISH	-0.152	0.003	-0.093	0.036	-0.077	-1.418	-0.285	-2.22
CLCF1	0.085	0.217	-0.093	-0.157	-0.976	-2.071	-0.638	-0.521
CMA1	0.405	0.017	-0.126	0.033	-3.887	-0.656	-0.402	-0.566
CMSS1	0.198	0.036	0.1	-0.114	-1.478	-0.863	-1.911	-0.575
CMTM6	-0.074	-0.085	0.075	-0.062	-0.672	-0.532	-1.055	-0.488
CNOT4	-0.2	-0.134	-0.093	-0.034	-0.222	-0.109	-1.184	-0.994
CNTNAP2	0.169	-0.063	-0.037	-0.043	-1.652	-0.789	-0.694	-1.087
COP1	-0.098	0.119	0.042	-0.037	-1.068	-1.507	-0.78	-2.18
COPS2	0.673	0.484	-0.668	-0.6	-7.237	-4.338	-0.139	-0.068
COPS3	0.614	0.548	-0.443	-0.548	-5.517	-5.914	-0.048	-0.043
COPS4	0.756	0.827	-1.119	-0.92	-6.601	-6.599	-0.024	-1.153
COPS5	0.834	0.369	-0.863	-0.013	-8.005	-4.329	-0.053	-1.12
COPS6	0.712	0.506	-0.637	0.052	-5.319	-4.225	-0.085	-0.804
COPS7A	0.088	0.16	0.01	-0.082	-1.253	-1.399	-0.635	-0.524
COPS7B	-0.063	0.018	-0.034	0.029	-0.263	-0.668	-1.086	-0.692
COPS8	0.512	0.485	-0.391	-0.564	-7.731	-6.099	-0.199	-0.088
CPSF1	0.512	-0.299	-0.081	-0.458	-3.824	-1.935	-0.577	-0.629
CRBN	-0.066	-0.037	0.03	0.088	-0.725	-0.648	-0.836	-1.022
CSHL1	-0.092	-0.121	-0.319	-0.107	-0.426	-0.224	-0.293	-0.224
CUL1	1.315	0.827	-0.693	-0.177	-10.58	-6.619	-0.032	-0.585
CUL2	0.026	-0.015	0.191	0.017	-0.543	-0.351	-2.104	-2.049
CUL3	0.216	-0.089	-0.023	0.237	-1.407	-0.357	-0.761	-2.149
CUL4A	0.082	-0.031	0.154	-0.112	-0.8	-1.25	-2.628	-0.469
CUL4B	0.166	0.259	-0.094	-0.28	-1.868	-3.548	-0.153	-0.204
CUL5	0.213	0.132	-0.172	-0.145	-2.389	-1.689	-0.227	-0.231
CUL7	0.111	-0.108	0.079	0.062	-0.759	-0.123	-1.166	-0.988
CUL9	-0.284	-0.108	0.195	0.058	-0.523	-0.285	-1.37	-0.66
CXADR	-0.127	-0.136	0.143	0.11	-0.331	-0.758	-2.168	-1.7
CYLD	-0.202	0.03	-0.043	0.141	-0.335	-1.618	-0.485	-2.254
DCAF1	0.413	-0.065	-0.018	0.091	-3.513	-1.513	-1.788	-4.325
DCAF10	-0.141	-0.083	0.006	0.001	-0.197	-0.434	-1.799	-1.062
DCAF11	0.328	0.008	-0.027	-0.244	-2.961	-0.604	-0.514	-0.567
DCAF12	-0.17	0.024	-0.123	-0.17	-0.417	-0.569	-0.255	-0.165
DCAF12L1	0.002	0.14	-0.088	-0.041	-1.07	-1.218	-0.506	-0.417
DCAF12L2	0.02	-0.15	0.129	-0.436	-0.812	-0.269	-1.244	-0.14
DCAF13	0.431	0.838	-0.812	-0.028	-2.905	-7.657	-0.034	-0.383
DCAF15	0.016	-0.176	0.65	0.206	-0.815	-0.023	-7.424	-2.545
DCAF16	0.029	-0.149	-0.055	0.071	-1.155	-0.444	-0.931	-1.536
DCAF17	-0.089	0.083	0.127	0.035	-0.77	-1.112	-1.096	-0.986
DCAF4	0.22	0.131	-0.244	-0.053	-2.522	-1.918	-0.412	-0.708
DCAF4L1	-0.094	-0.043	0.036	-0.081	-0.845	-1.359	-1.21	-0.595
DCAF4L2	0.134	-0.044	-0.146	0.084	-1.025	-0.748	-0.436	-2.001
DCAF5	0.291	0.149	-0.217	-0.13	-2.991	-2.476	-0.537	-0.372
DCAF6	-0.006	-0.181	0.095	-0.114	-0.441	-0.609	-2.353	-0.334
DCAF7	-0.367	0.103	0.148	0.436	-0.264	-0.897	-1.317	-5.607
DCAF8	-0.083	0.035	0.012	-0.11	-0.656	-0.485	-0.911	-0.827
DCAF8L1	0.279	0.087	-0.086	-0.055	-3.704	-2.481	-0.465	-0.94
DCAF8L2	0.029	0.11	0.002	0.06	-0.931	-2.302	-0.888	-1.012
DCST1	0.112	-0.081	0.369	0.212	-1.039	-0.117	-4.441	-2.257
DCUN1D1	-0.074	-0.182	0.075	0.19	-0.246	-0.393	-1.113	-4.926
DDA1	0.076	0.183	0.188	0.262	-1.201	-1.507	-1.856	-3.946
DDB1	0.279	0.09	-0.292	-0.211	-2.075	-1.264	-0.437	-0.197
DDB2	0.284	0.016	-0.105	-0.19	-2.102	-1.874	-0.212	-0.145
DET1	-0.025	0.252	-0.239	-0.252	-0.956	-2.621	-0.293	-0.638
DMWD	-0.07	-0.228	0.562	0.314	-0.896	-0.052	-6.664	-4.611
DPF1	0.121	0.032	0.503	0.382	-0.89	-1.099	-5.449	-6.211
DTL	-0.426	0.021	-0.744	0.229	-0.467	-3.377	-1.163	-5.573
DTX1	-0.178	0.064	0.153	0.28	-0.22	-0.768	-1.268	-3.228
DTX2	-0.017	-0.019	-0.054	-0.134	-0.439	-0.564	-0.606	-0.483
DTX3	-0.195	-0.121	-0.076	-0.165	-0.251	-0.311	-1.687	-0.198
DTX3L	0.224	0.103	-0.188	-0.027	-1.503	-2.009	-0.663	-0.915
DTX4	0.08	0.06	0.105	-0.219	-0.733	-1.193	-1.302	-0.348
DUS2	0.008	-0.031	-0.136	0.013	-0.699	-1.143	-0.58	-1.289
DZIP3	-0.068	0.038	0.014	-0.07	-0.55	-1.161	-1.458	-0.517
EBF4	-0.047	0.195	-0.051	-0.044	-0.703	-2.358	-0.757	-0.934
ECT2L	-0.152	-0.019	-0.085	0.037	-0.286	-0.635	-0.344	-1.689
EEF1A1	-0.055	0.407	0.371	-0.169	-0.609	-4.555	-2.914	-0.092
EIF3F	0.628	0.286	-1.06	-0.734	-5.517	-3.538	-0.033	-0.216
EIF3H	0.184	0.454	-0.28	-0.388	-1.998	-5.508	-0.073	-0.11
EIF4A3	0.31	-0.156	-0.01	-0.182	-3.064	-0.85	-1.124	-3.094
ELOA	1.158	1.062	-0.906	-0.911	-9.231	-10.472	-0.013	-0.008
ELOB	0	0.072	-0.125	-0.01	-0.524	-1.126	-0.47	-0.899
ELOC	0.098	0.169	0.108	0	-1.018	-2.065	-3.348	-3.507
ENC1	-0.001	-0.123	0.211	0.147	-0.339	-0.521	-1.676	-3.139
EPHB1	-0.038	-0.069	-0.171	0.035	-1.279	-0.352	-0.36	-0.773
EPX	0.379	0.069	-0.02	-0.035	-2.803	-2.269	-0.815	-0.444
ERCC8	-0.215	-0.127	0.312	0.066	-0.258	-0.389	-3.484	-1.702
FAM19A1	-0.072	-0.022	0.014	0.02	-0.459	-0.685	-0.717	-0.552
FAM83C	-0.137	0.074	-0.108	0.003	-0.869	-1.374	-0.508	-0.617
FANCL	-0.188	-0.059	-0.047	0.095	-0.399	-0.522	-0.58	-1.571
FBH1	-0.172	-0.199	0.215	0.084	-0.821	-0.458	-1.51	-1.64
FBXL12	-0.119	-0.385	0.571	0.384	-0.625	-0.096	-5.065	-5.573
FBXL13	0.068	-0.039	0.097	0.066	-1.381	-1.173	-0.763	-1.451
FBXL14	-0.114	-0.1	0.042	-0.075	-0.692	-0.169	-1.503	-0.284
FBXL15	-0.096	0.099	0.294	-0.023	-0.78	-1.226	-2.803	-1.201
FBXL16	-0.126	-0.18	0.094	-0.183	-0.269	-0.098	-0.898	-0.26
FBXL17	0.008	-0.076	-0.09	-0.043	-0.613	-0.461	-0.269	-0.737
FBXL18	-0.073	0.278	-0.302	-0.251	-0.307	-2.136	-0.199	-0.641
FBXL19	-0.121	-0.186	0.17	-0.021	-0.803	-0.314	-1.265	-0.582
FBXL2	-0.179	-0.1	-0.089	-0.021	-0.228	-0.456	-0.69	-0.767
FBXL20	0.279	0.165	-0.146	-0.198	-2.437	-1.472	-0.463	-0.335
FBXL21	-0.038	-0.178	0.124	-0.054	-0.596	-0.276	-1.564	-0.668
FBXL22	0.263	0.019	-0.007	-0.102	-2.098	-0.819	-0.853	-0.129
FBXL3	-0.179	-0.04	-0.079	0.029	-0.242	-0.495	-0.593	-1.754
FBXL4	-0.199	-0.13	0.119	0.057	-0.273	-0.733	-1.359	-1.203
FBXL5	-0.065	-0.033	0.025	0.103	-0.518	-0.601	-0.62	-1.035
FBXL6	-0.268	0.008	0.024	-0.045	-0.079	-1.512	-1.035	-0.701
FBXL7	-0.039	-0.235	0.043	0.059	-0.449	-0.712	-1.922	-1.293
FBXL8	-0.667	-0.032	0.113	0.167	-0.118	-0.376	-1.725	-1.764
FBXO10	0.096	-0.121	0.007	-0.006	-0.99	-0.409	-1.189	-0.664
FBXO11	-0.049	0.033	-0.429	-0.475	-0.546	-0.775	-0.091	-0.014
FBXO15	-0.068	0.069	-0.121	0.064	-0.868	-0.977	-0.881	-1.22
FBXO16	0.022	0.05	-0.038	-0.114	-0.486	-1.588	-0.394	-0.659
FBXO17	-0.226	-0.169	0.436	0.323	-0.121	-0.389	-4.173	-6.997
FBXO2	-0.15	-0.126	0.033	-0.218	-0.618	-0.118	-0.932	-0.758
FBXO21	0.016	0.024	0.009	-0.087	-0.73	-1.793	-0.747	-0.388
FBXO22	0.22	-0.088	0	-0.114	-2.331	-0.932	-0.794	-0.431
FBXO24	-0.215	-0.002	-0.064	0.076	-0.34	-0.466	-0.268	-1.227
FBXO25	-0.098	-0.171	0.018	-0.097	-0.404	-0.547	-0.691	-0.608
FBXO27	-0.274	-0.188	0.381	0.215	-0.169	-0.819	-3.23	-3.107
FBXO28	-0.121	-0.084	0.203	-0.07	-0.325	-0.37	-1.708	-0.397
FBXO3	0.149	0.069	-0.098	-0.205	-2.229	-1.172	-0.839	-0.134
FBXO30	0.077	0.025	-0.032	0.106	-0.857	-1.292	-0.696	-1.623
FBXO31	-0.054	-0.106	-0.078	0.169	-0.374	-0.158	-1.088	-2.346
FBXO32	0.019	0.084	-0.069	-0.041	-0.526	-1.408	-0.766	-0.517
FBXO33	0.2	-0.005	-0.114	-0.211	-1.507	-0.687	-0.322	-0.543
FBXO34	0.232	0.029	-0.02	-0.03	-1.738	-0.849	-0.615	-1.444
FBXO36	0.038	0.129	-0.009	0.069	-0.809	-1.291	-0.538	-1.099
FBXO38	-0.101	-0.05	-0.107	-0.005	-0.228	-0.704	-0.729	-0.457
FBXO39	0.077	-0.057	0.042	-0.009	-0.828	-0.72	-0.744	-0.979
FBXO4	-0.212	-0.193	0.225	0.244	-0.161	-0.981	-1.921	-2.929
FBXO40	-0.061	0.138	0.003	-0.03	-0.774	-1.542	-1.421	-0.896
FBXO41	-0.163	-0.058	0.017	0.001	-0.326	-0.465	-1.16	-0.64
FBXO42	0.168	0.221	-0.159	-0.228	-1.198	-2.863	-0.449	-0.096
FBXO43	0.094	0.077	-0.035	-0.118	-1.481	-0.972	-0.959	-0.404
FBXO44	-0.027	0.129	0.052	0.22	-0.365	-1.547	-1.075	-2.255
FBXO45	-0.022	-0.022	0.028	-0.04	-0.611	-0.468	-1.504	-1.139
FBXO46	-0.181	-0.207	0.536	0.364	-0.125	-0.259	-6.926	-4.744
FBXO47	-0.062	0.066	-0.011	-0.028	-1.984	-0.79	-0.411	-0.678
FBXO48	-0.105	0.052	-0.066	0.103	-0.67	-0.66	-0.507	-1.058
FBXO5	-0.45	0.303	-0.266	0.021	-1.216	-3.263	-1.212	-0.972
FBXO6	-0.098	-0.079	0.063	-0.028	-0.245	-0.91	-0.924	-2.357
FBXO7	-0.074	-0.071	-0.333	-0.169	-0.298	-0.826	-0.101	-0.418
FBXO8	-0.06	-0.001	-0.071	-0.082	-0.61	-0.651	-1.294	-0.716
FBXO9	-0.078	-0.173	0.102	0.035	-0.394	-0.295	-1.554	-1.095
FBXW10	0.102	0.06	0.055	-0.015	-1.065	-1.445	-0.888	-0.697
FBXW11	-0.095	-0.05	0.013	-0.302	-0.795	-0.573	-0.557	-0.191
FBXW12	0.05	-0.098	0.005	-0.083	-1.155	-0.584	-1.758	-0.458
FBXW2	0.038	-0.072	0.048	0.024	-0.944	-0.244	-0.852	-0.863
FBXW4	-0.148	-0.032	0.308	0.038	-0.281	-0.402	-3.181	-1.427
FBXW5	0.04	0.074	0.202	0.002	-0.569	-1.007	-1.905	-0.927
FBXW7	1.535	1.422	-1.278	-1.534	-24.853	-27.84	-0.018	-0.002
FBXW8	-0.184	-0.039	0.149	0.023	-0.414	-0.584	-1.871	-0.778
FBXW9	-0.201	-0.107	0.487	0.442	-0.07	-0.359	-4.398	-4.39
FSCN1	0.037	-0.222	-0.013	-0.319	-0.698	-0.085	-0.598	-0.105
FSIP1	0.093	0.102	0.078	-0.123	-1.16	-1.331	-1.133	-0.288
FZD3	-0.143	0.033	-0.039	-0.049	-0.789	-2.084	-0.797	-1.031
FZR1	-0.176	0	0.143	0.022	-0.155	-0.642	-1.872	-1.453
G3BP1	0.549	0.548	-0.577	-0.628	-5.667	-5.602	-0.123	-0.063
G3BP2	0.114	0.072	-0.131	-0.053	-0.849	-1.032	-0.568	-0.37
GABRR1	-0.031	-0.151	0.208	0.082	-0.787	-0.416	-2.501	-1.402
GAN	-0.015	-0.018	0.093	0.01	-0.648	-0.322	-2.172	-0.387
GFP	-0.223	0.264	-1.09	-0.317	-6.331	-10.352	-0.848	-5.155
GFRAL	-0.26	-0.074	0.186	0.121	-0.309	-0.63	-1.519	-1.956
GLT1D1	-0.048	-0.067	-0.029	-0.094	-0.6	-1.224	-0.902	-1.002
GMCL1	-0.038	0.058	0.005	0.007	-0.995	-0.651	-1	-0.69
GPS1	0.772	0.196	-0.788	0.013	-7.875	-1.817	-0.508	-1.706
GTF2H2	0.04	-0.176	0.437	0.081	-0.662	-1.161	-4.489	-0.782
GYS2	-0.118	-0.184	0.055	-0.095	-0.251	-0.23	-1.873	-0.298
GZF1	-0.006	0.025	0.044	-0.066	-1.045	-2.011	-1.224	-0.481
HACE1	-0.151	-0.075	0.206	0.108	-0.964	-0.309	-2.31	-1.034
HECTD1	0.159	-0.038	0.21	-0.091	-2.172	-0.633	-2.304	-0.347
HECTD2	-0.269	0.053	0.107	0.165	-0.308	-1.15	-1.573	-2.52
HECTD3	-0.015	0.002	0.025	0.089	-0.324	-0.447	-0.639	-1.84
HECTD4	-0.165	-0.06	0.078	0.225	-0.088	-0.498	-1.384	-2.818
HECW1	-0.043	-0.016	-0.058	0.113	-0.597	-0.444	-0.984	-1.739
HECW2	-0.026	-0.046	-0.205	0.049	-0.416	-0.38	-0.599	-1.151
HERC1	-0.021	0.129	-0.041	-0.165	-1.151	-1.439	-0.534	-0.278
HERC2	0.004	0.222	0.011	-0.221	-1.079	-2.719	-0.801	-0.298
HERC3	-0.017	0.018	-0.14	-0.125	-0.775	-0.773	-0.426	-0.604
HERC4	-0.093	0.012	0.062	0.018	-1.733	-0.88	-1.397	-0.715
HERC5	-0.014	0.031	-0.045	-0.203	-1.018	-0.924	-0.43	-0.539
HERC6	-0.105	-0.098	0.045	-0.057	-0.786	-0.361	-0.536	-0.737
HIC1	-0.125	0.033	0.068	-0.014	-0.544	-1.291	-1.409	-1.066
HIC2	0.036	0.052	-0.167	-0.139	-1.507	-0.911	-0.279	-0.208
HLA-DQB2	-0.068	-0.021	0.128	0.1	-0.474	-0.837	-0.928	-2.323
HLTF	0.319	0.003	-0.118	0.005	-2.299	-1.408	-0.75	-0.894
HRASLS	-0.14	0.182	0.044	0.135	-0.319	-2.093	-0.498	-1.674
HSPA9	0.063	0.214	-0.38	-0.16	-0.938	-2.86	-0.055	-1.597
HUWE1	0.203	0.313	0.093	0.246	-1.37	-2.736	-1.213	-3.278
IBTK	-0.211	-0.124	0.046	0.058	-0.158	-0.297	-1.377	-0.83
IFNA16	0.087	-0.178	0.069	-0.06	-0.713	-0.285	-1.087	-0.411
IPP	-0.113	-0.121	0.187	-0.017	-1.437	-0.193	-1.973	-0.853
IRF1	-0.098	-0.139	0.057	0.081	-0.936	-0.491	-2.056	-1.486
IRF2	-0.221	-0.223	0.009	-0.144	-0.181	-0.375	-0.854	-0.624
IRF2BP1	0.042	-0.003	0.234	0.319	-1.226	-0.838	-2.705	-3.448
IRF2BPL	0.157	0.106	-0.227	0.068	-1.038	-0.977	-0.313	-1.423
IRF3	-0.046	-0.227	0.254	0.327	-0.304	-0.555	-5.745	-5.423
IRF4	0.3	-0.13	0.08	0.056	-2.133	-0.222	-1.716	-1.917
IRF5	-0.112	-0.15	-0.023	0.053	-1.112	-0.355	-0.524	-0.902
IRF6	-0.02	-0.071	-0.033	-0.102	-0.493	-0.253	-1.023	-0.461
IRF7	0.043	0.203	-0.11	0.017	-1.098	-2.427	-0.923	-0.721
IRF8	-0.24	0.022	-0.142	0.124	-0.247	-0.693	-1.002	-2.003
IRF9	0.229	-0.002	-0.245	-0.098	-2.506	-0.646	-0.188	-0.744
IRGM	-0.027	-0.014	0.094	0.08	-0.263	-0.768	-1.073	-1.333
ISM2	0.216	-0.128	0.018	-0.121	-1.727	-0.251	-1.935	-0.363
ITCH	-0.094	0.036	0.057	-0.091	-0.385	-1.124	-0.639	-0.513
ITGA1	-0.269	-0.164	0.077	0.157	-0.187	-0.283	-2.1	-2.321
IVNS1ABP	-0.202	-0.012	0.189	0.141	-0.317	-0.433	-1.431	-2.369
JOSD1	-0.012	-0.078	-0.065	-0.028	-0.411	-0.266	-0.581	-0.573
JOSD2	0.109	-0.144	0.377	0.127	-0.914	-0.489	-2.91	-1.498
JPH4	0.374	0.185	0.017	-0.011	-2.918	-2.193	-1.745	-1.818
KBTBD11	0.16	-0.018	-0.118	0.046	-1.007	-0.466	-0.368	-0.704
KBTBD12	0.112	0.197	0.05	0.025	-1.413	-1.946	-0.742	-0.96
KBTBD13	0.067	0.133	-0.073	-0.136	-0.931	-2.066	-0.745	-0.723
KBTBD2	-0.8	-0.487	0.428	0.359	-0.043	-0.039	-3.479	-3.721
KBTBD3	0.174	0.113	0.091	-0.174	-1.337	-2.785	-1.049	-0.4
KBTBD4	0.038	0.035	0.003	-0.079	-0.934	-1.386	-0.878	-0.179
KBTBD6	-0.283	-0.087	-0.011	-0.05	-0.162	-0.456	-0.353	-0.773
KBTBD7	-0.097	-0.114	-0.335	0.05	-0.428	-0.48	-0.17	-0.742
KBTBD8	-0.024	-0.154	-0.049	0.024	-0.459	-0.471	-0.642	-0.899
KCNA1	0.015	-0.02	0.203	0.234	-0.389	-1.285	-2.913	-2.365
KCNA10	-0.12	-0.126	0.294	0.173	-0.456	-0.382	-2.935	-1.712
KCNA2	-0.097	-0.14	0.245	0.161	-0.474	-0.476	-3.212	-1.524
KCNA3	-0.213	-0.116	0.189	0.088	-0.535	-0.556	-1.495	-2.205
KCNA4	0.077	0.211	0.034	-0.05	-0.889	-2.903	-0.58	-0.261
KCNA5	-0.016	-0.09	-0.033	0.06	-0.624	-0.362	-0.936	-1.043
KCNA6	-0.256	-0.181	-0.077	0.04	-0.475	-0.372	-1.862	-0.708
KCNA7	-0.039	-0.044	0.503	0.245	-0.967	-0.353	-5.77	-3.222
KCNB1	0.01	-0.105	0.015	-0.121	-0.487	-0.626	-0.843	-0.449
KCNB2	-0.091	0.081	-0.013	-0.133	-0.922	-1.656	-1.034	-0.429
KCNC1	0.415	0.235	0.169	0.101	-2.879	-2.484	-1.539	-1.216
KCNC2	-0.042	-0.106	0.073	-0.018	-0.795	-0.081	-0.852	-0.591
KCNC3	0.007	-0.214	0.412	0.181	-1.206	-0.119	-7.629	-3.288
KCNC4	-0.427	-0.134	0.311	0.079	-0.666	-0.37	-2.184	-1.3
KCND1	0.33	0.035	-0.128	-0.078	-2.198	-0.804	-0.278	-1.208
KCND2	-0.004	-0.095	-0.159	-0.043	-0.512	-0.779	-0.46	-0.563
KCND3	-0.186	0.004	0.255	0.132	-0.526	-0.429	-3.254	-1.687
KCNG1	-0.175	0.075	0.122	0.123	-0.237	-1.106	-1.016	-1.588
KCNG3	0.063	0.009	0.058	-0.024	-1.514	-0.393	-0.918	-0.751
KCNRG	-0.026	-0.041	-0.004	-0.012	-1.206	-0.408	-0.654	-0.782
KCNS1	-0.128	0.158	-0.078	-0.029	-0.508	-1.834	-0.251	-0.507
KCNS2	-0.021	0.099	-0.092	-0.066	-0.616	-1.9	-0.376	-0.495
KCNS3	-0.115	-0.056	0.062	0.009	-0.86	-0.509	-1.161	-0.667
KCNV1	-0.001	-0.082	-0.103	-0.072	-0.82	-0.438	-0.75	-0.267
KCTD1	0.097	-0.086	-0.096	-0.017	-1.064	-0.373	-0.423	-1.479
KCTD10	0.02	-0.112	0.131	0.09	-0.414	-0.165	-1.088	-3.211
KCTD12	-0.195	-0.121	-0.117	-0.231	-0.106	-0.389	-0.329	-0.167
KCTD13	-0.001	-0.125	-0.126	-0.007	-0.693	-0.26	-0.367	-0.482
KCTD14	0.154	0.123	-0.191	-0.223	-1.256	-1.125	-0.314	-0.372
KCTD15	-0.422	-0.044	0.61	0.214	-0.178	-0.197	-6.998	-2.762
KCTD16	-0.038	-0.133	-0.068	-0.088	-1.127	-0.548	-0.85	-0.694
KCTD17	-0.099	-0.161	-0.103	-0.032	-0.415	-0.819	-0.394	-0.476
KCTD2	0.165	0.013	-0.243	-0.097	-2.357	-1.152	-0.284	-1.788
KCTD20	-0.11	-0.217	0.053	0.157	-0.229	-0.272	-1.086	-1.507
KCTD21	0.064	0.02	-0.185	-0.257	-1.038	-0.864	-0.309	-0.424
KCTD3	-0.041	-0.04	0.081	0.106	-0.948	-0.932	-0.878	-2.331
KCTD4	-0.069	-0.116	-0.045	-0.13	-0.751	-0.356	-0.425	-0.38
KCTD5	0.235	0.064	-0.077	-0.171	-2.012	-1.225	-1.086	-0.652
KCTD6	0.108	0.025	0.022	-0.175	-0.947	-1.059	-0.833	-0.213
KCTD7	-0.053	-0.185	-0.109	0.025	-0.645	-0.143	-0.453	-0.731
KCTD8	-0.062	-0.096	0.138	-0.074	-0.502	-0.45	-1.237	-0.385
KCTD9	0.227	-0.028	-0.183	-0.079	-1.76	-1.103	-0.35	-0.629
KDM2A	0.125	0.178	-0.529	-0.258	-1.763	-1.909	-0.113	-0.207
KDM2B	-0.325	-0.187	-0.075	0.025	-0.112	-0.16	-0.462	-0.538
KEAP1	-0.203	0.036	0.363	0.453	-0.296	-0.49	-4.209	-7.096
KLHDC10	0.122	0.002	-0.145	-0.063	-0.966	-0.71	-0.46	-1.299
KLHDC2	0.105	0.066	-0.406	-0.192	-1.787	-0.821	-1.356	-0.763
KLHDC3	0.118	-0.005	0.185	0.228	-1.135	-0.359	-2.039	-2.419
KLHL1	-0.083	-0.132	-0.118	0.044	-0.387	-0.352	-0.472	-0.59
KLHL10	0.043	0.07	-0.057	-0.085	-0.83	-0.749	-1.165	-0.467
KLHL11	-0.064	-0.001	-0.062	0.079	-0.419	-0.78	-1.084	-1.51
KLHL12	-0.048	-0.047	0.105	0.129	-0.303	-0.422	-1.073	-1.304
KLHL13	0.227	0.004	-0.019	-0.161	-1.925	-1.042	-1.568	-0.425
KLHL14	-0.034	0.081	0.077	0.194	-0.469	-0.832	-2.213	-2.961
KLHL15	0.213	-0.135	-0.162	-0.278	-1.407	-0.2	-0.378	-0.12
KLHL17	-0.19	0.008	0.095	0.086	-0.692	-0.429	-1.817	-1.448
KLHL18	-0.279	-0.084	-0.041	-0.04	-0.615	-0.327	-0.673	-0.766
KLHL2	-0.136	-0.089	-0.049	-0.103	-0.395	-0.953	-0.497	-0.878
KLHL20	-0.238	-0.188	0.341	0.284	-0.273	-0.35	-4.022	-4.168
KLHL21	-0.154	-0.151	0.094	-0.145	-0.45	-0.159	-0.918	-0.28
KLHL22	0.057	-0.004	-0.108	-0.2	-1.754	-1.227	-0.554	-0.395
KLHL23	-0.144	-0.08	0.266	-0.07	-0.826	-0.443	-2.493	-1.003
KLHL24	-0.108	0.032	-0.072	-0.084	-0.608	-0.823	-0.781	-0.758
KLHL25	0.152	0.103	-0.03	-0.018	-1.068	-2.823	-0.864	-0.292
KLHL26	-0.452	-0.076	0.735	0.589	-0.166	-0.288	-7.793	-6.365
KLHL28	0.248	0.13	-0.075	0.002	-2.547	-2.426	-0.372	-1.584
KLHL29	-0.096	-0.013	-0.15	-0.042	-0.486	-0.627	-0.25	-1.141
KLHL3	-0.02	0.01	-0.018	0.144	-0.3	-0.4	-0.723	-1.956
KLHL30	-0.166	-0.127	0.005	-0.037	-0.271	-0.641	-0.423	-0.844
KLHL31	-0.031	0.017	0.173	0.023	-0.351	-0.578	-1.717	-0.888
KLHL32	0.065	-0.049	0.117	0.117	-0.781	-1.154	-3.875	-3.603
KLHL33	0.278	0.103	-0.146	-0.02	-2.187	-1.398	-0.809	-0.401
KLHL34	0.273	0.127	-0.039	0.096	-2.451	-1.231	-0.393	-0.977
KLHL35	0.229	0.001	-0.071	-0.148	-1.752	-0.526	-1.037	-0.647
KLHL36	-0.074	-0.03	0.181	-0.024	-0.542	-0.549	-2.013	-1.341
KLHL38	-0.015	0.233	-0.262	-0.007	-1.214	-2.31	-0.435	-1.153
KLHL4	0.181	0.07	-0.016	0.001	-2.605	-0.902	-1.23	-0.632
KLHL40	0.009	0.008	-0.125	-0.051	-0.549	-0.551	-0.238	-0.892
KLHL41	0.095	-0.056	0.026	0.046	-0.953	-0.519	-1.559	-0.656
KLHL42	-0.17	0.024	0.034	0.198	-0.646	-0.798	-1.591	-2.096
KLHL5	0.061	0.051	-0.004	-0.03	-0.64	-1.653	-0.979	-0.579
KLHL6	-0.171	-0.015	-0.125	-0.033	-0.212	-0.935	-0.499	-1.255
KLHL7	-0.031	0.061	-0.065	0.123	-1.044	-1.57	-1.681	-1.605
KLHL8	0.036	-0.077	-0.18	-0.086	-0.528	-0.672	-0.277	-0.508
KLHL9	-0.079	-0.023	-0.044	0.047	-0.995	-0.414	-0.942	-1.673
KRT8	-0.091	0.321	-0.101	0.09	-0.806	-2.861	-0.231	-4.093
KRTAP19-7	-0.17	-0.218	-0.325	-0.01	-1.015	-0.575	-0.245	-0.817
LAMA4	-0.004	-0.004	0.15	0.083	-0.858	-0.691	-1.861	-2.183
LCN1	0.026	-0.063	-0.12	-0.199	-0.814	-0.413	-0.127	-0.266
LEP	0.013	-0.186	0.034	0.012	-0.522	-0.33	-0.919	-0.504
LGALS3BP	0.061	0.024	-0.017	0.01	-0.686	-1.354	-0.524	-0.521
LGALS9C	0.325	0.371	-0.061	-0.052	-1.885	-2.82	-0.209	-0.292
LMO7	-0.113	0.056	-0.126	-0.054	-0.887	-0.628	-0.396	-0.734
LNX1	0.16	-0.005	-0.057	-0.08	-1.509	-0.738	-0.418	-0.577
LNX2	-0.147	0.014	-0.029	0.017	-0.098	-1.368	-0.508	-1.567
LONRF1	-0.069	-0.048	-0.091	0.128	-0.675	-1.024	-0.47	-1.755
LONRF2	-0.035	-0.029	0.165	-0.059	-0.325	-0.346	-2.029	-0.832
LONRF3	-0.022	0.075	-0.173	-0.152	-0.486	-1.278	-0.249	-0.63
LPO	0.169	0.118	-0.137	-0.092	-2.76	-1.091	-0.259	-0.678
LRRC14	0.065	-0.045	0.029	-0.172	-0.598	-0.787	-0.855	-1.275
LRRC29	-0.152	-0.096	0.083	0.174	-0.303	-0.287	-0.669	-2.138
LRRC42	-0.057	0.017	-0.012	-0.148	-0.64	-0.773	-0.641	-0.141
LRRC66	0.087	-0.043	0.038	-0.126	-1.824	-0.605	-1.369	-0.711
LRSAM1	-0.109	-0.087	-0.075	-0.168	-0.882	-0.444	-0.832	-0.36
LTN1	-0.442	-0.269	0.241	0.186	-0.05	-0.087	-1.934	-2.724
LZTR1	0.008	0.091	0.074	-0.04	-0.673	-1.116	-0.6	-0.761
MAGEB4	0.41	0.007	-0.286	-0.028	-2.847	-0.845	-0.956	-0.805
MALT1	0.022	-0.061	-0.073	-0.088	-0.748	-0.431	-0.889	-1.269
MAP1LC3C	-0.161	0.025	0.095	0.035	-0.411	-0.879	-0.984	-0.9
2020-03-01	0.088	0.03	0.062	-0.038	-1.517	-1.146	-1.312	-1.024
2020-03-02	-0.007	-0.05	0.559	0.381	-0.445	-0.394	-6.619	-7.486
2020-03-03	-0.118	-0.116	0.185	0.006	-0.917	-0.383	-1.531	-1.074
2020-03-04	-0.051	-0.034	0.057	-0.029	-0.568	-0.253	-2.123	-0.537
2020-03-05	-0.081	-0.117	0.177	0.087	-0.164	-0.373	-1.958	-1.685
2020-03-06	-0.267	-0.175	-0.091	0.036	-0.357	-0.302	-0.559	-0.543
2020-03-07	-0.121	0.066	0.063	-0.017	-0.819	-0.82	-0.717	-1.221
2020-03-08	0.14	0.028	0.206	0.196	-1.25	-1.605	-2.824	-3.322
2020-03-09	-0.022	0.078	0.257	0.036	-0.737	-1.184	-1.95	-0.856
2020-03-10	0.091	0.15	0.018	-0.007	-1.183	-2.229	-1.995	-0.596
2020-03-11	0.009	-0.258	0.071	0.102	-1.461	-1.55	-0.859	-3.064
MARK2	0.268	0.089	0.023	0.103	-1.979	-0.746	-0.805	-1.141
mCHERRY	1.713	1.719	-1.718	-2.429	-30.947	-36.73	-0.001	-0.001
MDM2	-0.164	-0.106	0.273	0.028	-0.159	-0.412	-2.356	-1.166
MDM4	-0.033	-0.089	0.004	0.033	-0.328	-0.545	-2.266	-0.955
ME1	0.01	-0.107	0.008	0.103	-0.409	-0.467	-1.631	-1.708
MED12L	-0.194	0.116	-0.066	-0.034	-0.7	-0.983	-1.25	-0.627
MEX3A	-0.176	-0.089	0.242	0.142	-0.278	-0.255	-1.908	-1.8
MEX3B	0.274	-0.029	0.151	-0.148	-2.591	-1.147	-1.229	-0.535
MEX3C	-0.042	-0.08	0.052	0.048	-0.359	-0.324	-1.099	-0.883
MEX3D	-0.296	-0.175	0.394	0.408	-1.08	-0.12	-3.412	-4.275
MGRN1	-0.053	-0.189	-0.298	-0.065	-0.294	-0.46	-0.194	-0.457
MIB1	-0.308	-0.21	0.063	0.186	-0.04	-0.167	-1.243	-2.011
MIB2	-0.184	0.015	0.052	-0.038	-0.191	-0.526	-0.957	-1.538
MICAL1	-0.273	0.057	0.089	0.077	-0.578	-0.897	-0.768	-0.753
MID1	0.195	0.043	-0.098	-0.01	-1.871	-0.63	-0.425	-1.132
MID2	-0.08	-0.027	-0.109	-0.048	-0.348	-0.623	-0.574	-0.237
MKRN1	-0.135	-0.19	-0.13	0.066	-0.283	-0.225	-2.888	-1.699
MKRN2	-0.103	-0.037	0.027	-0.161	-0.301	-0.606	-0.651	-0.306
MKRN3	0.19	0.266	-0.035	-0.08	-1.651	-2.727	-0.877	-0.652
MNAT1	-0.026	0.001	0.293	0.21	-0.34	-0.37	-4.701	-5.077
MSI1	-0.159	-0.138	0.074	0.003	-0.231	-0.752	-0.937	-1.564
MSL2	-0.137	-0.158	0.237	0.239	-0.125	-0.54	-3.505	-2.946
MTRNR2L7	0.023	0.015	0.068	0.175	-0.696	-1.111	-1.427	-2.145
MUL1	-0.268	-0.172	0.201	-0.032	-0.259	-0.336	-2.474	-0.798
MYC	-0.12	0.115	-0.021	0.039	-1.115	-1.5	-0.342	-0.697
MYCBP2	-0.306	-0.18	-0.162	-0.024	-0.484	-0.576	-0.403	-1.527
MYLIP	0.057	0.161	0.197	0.13	-1.062	-1.446	-2.45	-1.979
MYNN	-0.098	0.002	0.036	-0.058	-0.968	-1.034	-1.057	-0.518
NACC1	-0.28	0.062	0.533	0.398	-0.237	-1.144	-7.559	-6.206
NACC2	0.158	-0.054	-0.096	-0.103	-1.52	-0.175	-0.77	-0.199
NAE1	1.342	-0.138	-0.785	-0.24	-10.805	-0.564	-0.021	-0.579
NDUFA4	-0.039	-0.07	0.069	0.096	-0.563	-0.308	-0.879	-2.092
NEDD4	0.215	0.005	-0.108	-0.304	-1.753	-0.765	-1.373	-0.45
NEDD4L	-0.104	-0.078	0.048	0.036	-0.358	-0.424	-0.646	-1.147
NEDD8	1.721	0.593	-1.471	-0.045	-14.497	-6.03	-0.012	-2.698
NEURL1	-0.121	-0.187	0.235	0.055	-0.687	-0.507	-2.169	-1.04
NEURL1B	-0.15	-0.033	-0.009	-0.051	-0.253	-0.438	-0.566	-0.608
NEURL2	0.002	0.072	-0.131	0.023	-0.393	-2.306	-0.75	-1.576
NEURL3	-0.126	-0.053	0.261	0.047	-0.135	-0.29	-2.783	-0.804
NEXMIF	0.099	0.127	-0.227	-0.1	-1.255	-1.068	-0.194	-0.493
NFATC4	0.129	-0.121	-0.064	-0.041	-1.107	-0.531	-0.205	-0.206
NFX1	-0.141	-0.007	0.115	-0.079	-0.332	-1.612	-1.486	-0.499
NFXL1	0	0.043	-0.003	-0.125	-1.292	-1.092	-0.71	-0.291
NHLRC1	-0.043	0.107	-0.137	0.058	-0.446	-1.162	-0.686	-1.074
NKAIN3	-0.052	0.096	-0.162	-0.017	-0.691	-1.427	-0.414	-0.961
NOSIP	0.048	-0.205	0.258	-0.009	-0.793	-0.201	-2.709	-0.546
NSD2	0.107	0.053	-0.117	-0.044	-2.309	-1.841	-0.619	-0.997
NSMCE1	-0.074	0.047	-0.044	0.093	-0.421	-1.659	-1.417	-1.454
OAT	0.49	0.037	-0.085	0.044	-4.767	-0.946	-1.199	-0.84
OR10A4	0.051	0.04	0.104	-0.164	-1.187	-0.836	-0.941	-0.566
OR10S1	-0.131	0.173	0.009	-0.067	-0.427	-1.936	-0.687	-0.385
OR10X1	-0.065	0.022	-0.015	0.066	-0.208	-1.069	-2.01	-1.068
OR10Z1	-0.16	0.086	0.061	0.21	-0.415	-0.96	-2.195	-2.672
OR13C8	-0.026	-0.116	-0.025	0.055	-0.75	-1.153	-0.811	-2.397
OR13H1	0.228	0.108	-0.007	-0.037	-2.722	-1.469	-0.983	-1.403
OR13J1	0.094	0.027	-0.06	-0.042	-0.971	-1.125	-1.091	-0.377
OR1F1	0.131	0.017	-0.053	0.054	-1.472	-0.567	-0.239	-1.236
OR2AG2	0.111	0.112	-0.02	-0.029	-2.683	-1.945	-0.38	-0.607
OR2C1	0.04	-0.001	-0.024	0.082	-0.566	-1.104	-0.62	-0.812
OR2W1	0.109	-0.142	0.036	0.013	-1.309	-0.114	-0.885	-1.518
OR3A1	-0.003	-0.097	0.003	-0.136	-0.727	-0.869	-0.958	-0.108
OR3A2	-0.126	-0.033	0.084	-0.141	-0.277	-0.482	-0.818	-0.269
OR4C16	0.136	0.138	0.026	-0.079	-2.021	-2.018	-0.609	-0.377
OR4P4	0.106	0.144	-0.131	-0.243	-1.089	-1.602	-0.638	-0.403
OR4X1	0.165	0.175	-0.214	-0.067	-1.073	-2.264	-0.738	-0.294
OR52B2	-0.038	0.003	-0.112	-0.106	-0.82	-0.925	-0.684	-0.163
OR52B6	-0.081	-0.001	-0.014	-0.113	-0.405	-1.876	-0.626	-0.374
OR52D1	0.105	0.066	-0.072	-0.045	-2.776	-2.158	-0.205	-0.599
OR52J3	0.176	0.124	0.125	-0.107	-1.529	-2.15	-1.366	-0.777
OR52N1	0.079	0.034	-0.08	-0.018	-0.858	-0.816	-0.874	-0.601
OR5C1	0.034	0.123	0.036	-0.097	-1.865	-1.121	-1.154	-0.577
OR5R1	0.089	0.114	-0.171	-0.179	-0.768	-1.061	-0.354	-0.442
OR6C6	-0.14	-0.036	-0.036	-0.013	-0.79	-0.33	-0.798	-0.593
OR6K2	-0.069	0.104	0.121	0.177	-0.792	-0.814	-1.226	-2.607
OR6N1	-0.064	-0.102	0.147	0.065	-1.022	-0.914	-1.466	-1.796
OR6X1	0.139	0.032	0.012	0.027	-1.671	-0.556	-0.521	-0.507
OR7D2	-0.09	-0.068	0.529	0.484	-0.503	-0.32	-4.298	-5.612
OR7G3	-0.026	-0.112	0.471	0.275	-0.569	-0.565	-4.544	-3.687
OR9A2	-0.11	-0.055	-0.045	-0.046	-0.262	-1.113	-0.811	-1.336
OSBPL10	-0.001	-0.068	-0.05	0.055	-0.754	-0.76	-0.869	-1.483
OSBPL9	-0.103	-0.143	0.261	-0.026	-0.182	-0.208	-3.485	-0.53
OSM	-0.011	0.07	-0.263	-0.129	-0.542	-1.756	-0.505	-0.255
OSTM1	-0.081	-0.098	0.044	0.081	-0.648	-0.33	-1.055	-1.897
OTUB1	0.198	0.171	-0.335	-0.439	-1.213	-1.897	-0.059	-0.15
OTUB2	0.224	0.086	0.053	0.052	-1.731	-1.255	-1.621	-1.344
OTUD1	-0.297	-0.214	0.209	0.038	-0.556	-0.158	-1.393	-2.114
OTUD4	0.19	0.041	-0.183	-0.101	-1.757	-1.721	-0.153	-0.421
OTUD5	1.617	1.82	-1.346	-1.663	-18.607	-20.059	-0.009	-0.003
OTUD6B	-0.046	0.218	-0.092	-0.211	-1.953	-2.683	-0.625	-0.292
OTUD7A	0.055	-0.017	0.11	-0.24	-0.787	-1.464	-0.943	-0.228
OTUD7B	-0.193	-0.071	0.408	0.128	-0.271	-0.275	-3.063	-2.016
P2RX4	0.106	0.015	0.333	0.137	-0.964	-0.904	-2.732	-1.837
PAN2	-0.264	-0.147	0.173	-0.046	-0.074	-0.168	-2.028	-0.688
PARP11	-0.068	0.072	-0.034	0.098	-0.651	-0.949	-0.4	-3.38
PATZ1	0.268	0.216	-0.304	-0.127	-1.776	-3.011	-0.267	-0.778
PAX1	-0.144	0.02	0.009	-0.062	-1.003	-0.479	-0.454	-0.215
PCDHB9	-0.059	-0.001	0.132	0.071	-0.471	-0.68	-1.053	-1.104
PCGF1	-0.092	0.065	0.246	0.171	-0.43	-0.677	-2.177	-3.351
PCGF2	0.281	0.101	-0.095	-0.014	-2.622	-1.811	-0.525	-1.442
PCGF3	-0.162	-0.09	-0.043	-0.022	-0.319	-0.107	-0.618	-0.651
PCGF5	-0.13	-0.122	0.081	-0.065	-0.368	-0.176	-1.293	-0.506
PCGF6	-0.025	-0.153	0.219	0.34	-0.842	-0.508	-1.865	-4.328
PCP2	0	-0.264	0.543	0.18	-1.006	-0.142	-5.361	-3.295
PDZRN3	0.268	-0.134	-0.031	-0.111	-2.051	-0.773	-0.644	-0.719
PDZRN4	-0.246	0.013	0.098	0.128	-0.19	-1.04	-1.25	-2.123
PELI1	-0.009	0.059	0.032	0.039	-0.369	-0.619	-1.21	-0.681
PELI2	0.23	0.157	0.062	0.024	-2.581	-1.481	-0.591	-0.783
PELI3	0.002	-0.022	-0.144	-0.09	-2.184	-0.607	-0.318	-0.745
PEX10	-0.089	-0.003	0.085	0.017	-0.216	-0.761	-2.763	-1.619
PEX12	-0.034	0.083	-0.107	0.004	-1.434	-1.279	-0.728	-0.491
PEX2	0.03	-0.002	0.056	-0.023	-1.391	-1.155	-0.631	-0.789
PF4V1	0.008	-0.051	-0.141	-0.035	-1.178	-0.333	-0.415	-0.645
PHF5A	-0.058	0	-0.072	-0.103	-0.808	-2.188	-2.308	-2.432
PHF7	-0.198	-0.116	0.019	-0.082	-0.12	-0.584	-1.279	-0.747
PHIP	-0.196	-0.073	0.294	0.126	-0.365	-0.458	-2.499	-2.601
PHLPP1	-0.102	-0.06	0.074	-0.018	-0.649	-0.469	-1.067	-0.702
PHLPP2	-0.208	-0.038	0.105	0.076	-0.126	-0.366	-0.771	-0.949
PHRF1	0.005	0.081	-0.062	-0.11	-0.533	-0.956	-0.421	-0.419
PIAS1	-0.158	0.18	-0.112	-0.122	-0.38	-3.038	-0.756	-0.531
PIAS2	-0.023	0.167	-0.065	0.057	-0.768	-1.574	-0.462	-1.408
PIAS3	0.006	-0.084	0.271	-0.006	-0.471	-0.189	-2.244	-1.259
PIAS4	-0.019	0.226	0.176	0.317	-0.675	-1.78	-3.437	-4.177
PJA1	0.034	0.015	-0.171	-0.036	-0.487	-1.042	-0.404	-0.586
PJA2	-0.066	0.075	0.092	-0.075	-0.95	-0.805	-1.214	-0.671
PLAUR	-0.138	-0.082	0.364	0.238	-0.49	-0.294	-3.866	-3.583
PLD3	-0.165	-0.263	0.588	0.161	-0.345	-0.131	-5.136	-2.299
PLK1	0.109	0.342	0.148	0.026	-4.339	-2.108	-1.965	-1.79
PLSCR1	-0.017	0.006	-0.028	-0.09	-0.462	-0.593	-1.836	-0.409
PML	0.092	0.177	-0.208	-0.039	-1.099	-1.989	-0.209	-0.571
POLR2A	0.528	-0.226	0.228	-0.018	-3.736	-3.064	-2.406	-0.75
POMP	0.382	0.179	-0.381	-0.267	-3.824	-1.537	-0.029	-0.385
PPIL2	-0.001	0.526	1.054	-0.009	-0.389	-4.53	-12.574	-1.252
PRAC1	-0.174	0.066	-0.107	-0.1	-0.489	-1.822	-0.947	-0.252
PRKN	-0.11	0.024	0.091	0.034	-0.69	-0.577	-0.877	-0.804
PROP1	-0.251	-0.101	-0.05	0.041	-0.259	-0.474	-0.228	-0.975
PRPF19	0.059	0.033	-0.236	0.061	-1.136	-1.179	-0.409	-1.295
PRPF4	-0.653	-0.135	0.212	0.326	-0.097	-0.674	-2.041	-4.329
PRSS22	-0.079	0.037	-0.115	0.026	-0.844	-1.18	-0.665	-2.507
PRSS56	-0.164	-0.095	0.202	-0.025	-0.864	-0.521	-1.748	-0.598
PSMA1	0.542	0.327	-0.13	-0.42	-4.891	-3.986	-1.85	-0.035
PSMA2	0.579	0	-0.729	0.047	-6.534	-3.124	-1.158	-1.13
PSMA3	0.436	0.456	-1.08	-0.089	-3.68	-3.77	-0.049	-3.148
PSMA4	0.578	0.546	-0.844	-0.481	-4.74	-4.648	-2.111	-0.836
PSMA5	0.814	0.582	-0.51	0.002	-5.375	-4.447	-0.834	-1.143
PSMA6	0.717	0.033	-0.527	-0.396	-5.774	-0.857	-0.104	-0.892
PSMA7	0.979	-0.055	-0.291	-0.058	-7.265	-1.41	-0.056	-0.612
PSMB3	0.638	0.263	-0.423	-0.076	-6.08	-2.5	-2.372	-1.356
PSMB4	0.05	-0.004	-0.391	-0.464	-2.325	-2.004	-1.115	-2.462
PSMB5	0.105	0.361	-1.038	-0.038	-3.935	-3.785	-2.966	-2.866
PSMB6	0.82	0.656	-0.837	0.087	-7.42	-5.343	-0.074	-2.22
PSMC1	0.732	0.014	-0.339	-0.047	-5.952	-1.748	-0.209	-0.801
PSMD14	0.226	0.332	-0.701	-0.378	-2.138	-2.551	-0.045	-1.691
PSMD7	0.16	0.247	-0.399	-0.176	-1.637	-2.279	-0.078	-0.071
PSMF1	0.002	0.126	-0.017	-0.02	-0.964	-1.031	-0.315	-0.531
PSMG1	-0.083	0.474	0.023	-0.295	-0.321	-4.21	-0.978	-0.796
PSMG3	0.525	0.065	-0.542	-0.282	-4.712	-1.151	-0.057	-1.224
PTGER4	-0.275	-0.177	0.18	0.222	-0.242	-0.064	-1.437	-2.349
PTOV1	0.105	-0.122	0.387	0.338	-1.774	-0.401	-3.902	-3.727
RAB40A	0.262	0.288	-0.158	-0.026	-1.838	-2.218	-0.407	-0.576
RAB40B	-0.051	-0.005	0.082	-0.135	-0.384	-0.765	-0.882	-0.126
RAB40C	-0.01	0.132	-0.235	-0.041	-1.524	-1.668	-0.365	-0.566
RABGAP1L	-0.091	0.051	0.141	0.086	-0.981	-1.419	-3.038	-3.178
RABGEF1	-0.135	0.304	0.188	0.016	-0.512	-2.355	-1.236	-0.459
RAD18	0.038	0.032	0.007	-0.037	-1.026	-1.044	-0.575	-1.008
RAE1	0.225	0.052	0.277	0.008	-2.397	-1.557	-2.083	-1.375
RAG1	0.06	0.058	-0.176	-0.135	-1.073	-2.058	-0.436	-0.281
RAN	-0.803	-0.07	-0.733	-0.109	-1.333	-0.199	-0.197	-0.232
RAPSN	0.245	0.053	-0.118	-0.232	-1.738	-0.651	-0.438	-0.263
RASGRF1	-0.123	0.176	-0.113	-0.048	-0.365	-4.344	-0.256	-0.666
RBBP6	1.123	0.733	-1.068	-0.504	-16.242	-12.124	-0.006	-0.023
RBCK1	0.036	-0.028	0.029	-0.066	-0.985	-0.49	-1.45	-0.623
RBX1	0.873	0.481	-0.697	-0.424	-7.25	-3.841	-0.014	-0.938
RC3H1	-0.219	-0.017	0.176	0.04	-0.742	-0.683	-3.287	-1.094
RC3H2	-0.054	0.125	-0.06	-0.003	-0.547	-1.61	-0.251	-0.559
RCBTB1	0.088	0.008	0.09	-0.09	-2.054	-0.805	-1.903	-0.586
RCBTB2	-0.065	-0.074	-0.024	0.004	-1.141	-0.5	-0.483	-0.918
RCHY1	0.138	0.076	0.003	-0.05	-1.286	-1.904	-0.746	-1.043
RFFL	-0.12	0.048	-0.007	-0.041	-1.256	-2.172	-0.936	-0.67
RFPL1	-0.018	0.25	-0.152	-0.111	-0.399	-2.3	-0.312	-0.536
RFPL2	-0.039	0.245	0.042	0.095	-0.298	-2.796	-0.899	-0.893
RFPL3	-0.07	-0.069	-0.262	-0.203	-0.652	-0.302	-0.162	-0.411
RFPL4A	-0.007	0.018	0.512	0.353	-0.731	-0.698	-6.848	-6.91
RFPL4B	-0.188	-0.095	0.017	0.13	-0.561	-0.706	-0.437	-1.619
RFWD3	-0.138	-0.232	0.152	-0.015	-0.532	-0.324	-1.171	-0.899
RGS7	-0.126	-0.08	0.287	0.115	-0.42	-0.336	-2.864	-1.201
RHEX	-0.105	0.007	-0.097	0.092	-0.324	-0.443	-0.446	-2.021
RHOBTB1	-0.111	0.082	0.234	0.389	-0.391	-1.301	-2.185	-3.886
RHOBTB2	-0.173	-0.028	-0.026	-0.037	-0.568	-0.682	-0.277	-0.311
RHOBTB3	0.115	-0.042	0.083	0.016	-0.903	-0.558	-0.807	-0.686
RING1	0.005	-0.083	0.084	0.134	-0.446	-0.147	-1.011	-1.252
RLIM	0.29	0.462	-0.44	-0.539	-2.24	-7.368	-0.291	-0.175
RNF10	-0.471	-0.13	0.063	0.08	-0.062	-0.464	-2.206	-1.715
RNF103	-0.076	-0.133	0.079	0	-0.474	-0.406	-2.241	-0.708
RNF11	-0.003	0.037	0.252	0.134	-0.63	-0.56	-2.553	-2.349
RNF111	0.167	0.047	-0.092	-0.17	-1.788	-1.733	-0.43	-0.402
RNF112	0.171	0.167	-0.005	-0.08	-1.186	-1.79	-1.382	-0.586
RNF113A	0.273	-0.043	-0.145	-0.194	-3.028	-2.306	-0.73	-1.454
RNF113B	-0.131	-0.031	-0.097	-0.164	-0.28	-0.403	-0.931	-0.402
RNF114	0.036	0.03	0.114	0.035	-0.751	-0.538	-1.136	-1.235
RNF115	-0.362	-0.041	-0.006	0.136	-0.084	-0.718	-1.652	-1.37
RNF121	0.044	0.051	-0.159	-0.119	-1.094	-0.85	-0.894	-0.374
RNF122	-0.123	-0.066	-0.027	-0.081	-0.939	-0.468	-0.293	-0.548
RNF123	0.092	-0.031	-0.116	-0.047	-1.739	-0.62	-0.666	-0.453
RNF125	-0.234	-0.108	-0.004	0.047	-0.776	-0.794	-0.534	-0.89
RNF126	0.11	0.213	0.159	0.201	-0.966	-1.93	-1.611	-2.972
RNF128	-0.013	0.064	-0.096	-0.041	-0.989	-1.246	-0.298	-0.741
RNF13	-0.037	0.051	-0.167	-0.03	-0.767	-0.873	-0.844	-0.439
RNF130	-0.01	-0.022	-0.018	0.144	-0.498	-0.259	-0.585	-1.364
RNF133	-0.251	0.003	-0.253	0.024	-0.146	-0.673	-0.347	-1.181
RNF135	0.342	-0.028	-0.231	-0.189	-2.477	-0.501	-0.3	-0.319
RNF138	-0.014	0.009	-0.032	-0.157	-0.941	-0.844	-1.332	-0.473
RNF139	-0.088	-0.069	-0.074	-0.072	-0.497	-0.362	-0.441	-0.533
RNF14	-0.041	-0.178	-0.018	0.052	-0.332	-0.441	-1.612	-1.356
RNF141	0.117	0.099	-0.062	-0.065	-0.908	-0.939	-0.557	-0.145
RNF144A	-0.009	0.025	0.099	-0.062	-0.879	-1.031	-1.16	-1.449
RNF144B	-0.318	-0.166	0.051	-0.021	-0.791	-0.096	-1.095	-0.588
RNF145	-0.106	-0.132	-0.002	-0.098	-0.577	-0.638	-1.958	-0.449
RNF146	-0.111	-0.081	0.401	0.242	-0.475	-0.492	-3.437	-3.991
RNF148	-0.049	-0.019	0.05	-0.004	-0.56	-0.888	-0.803	-0.795
RNF149	-0.194	-0.143	0.153	0.153	-0.426	-0.326	-1.326	-1.43
RNF150	0.1	0.075	-0.182	0.063	-1.382	-2.365	-0.219	-1.317
RNF151	-0.142	-0.032	-0.24	-0.092	-0.835	-0.435	-0.504	-0.418
RNF152	0.184	-0.127	0.055	-0.082	-1.413	-0.336	-0.762	-0.535
RNF157	0.175	0.1	-0.064	-0.026	-1.217	-1.629	-0.882	-0.37
RNF165	-0.177	-0.007	0.013	0.076	-0.084	-0.598	-0.992	-1.595
RNF166	-0.075	-0.21	-0.027	-0.097	-0.453	-0.155	-0.408	-0.541
RNF167	0.313	0.003	-0.236	0.046	-3.344	-1.05	-0.175	-0.959
RNF168	0.071	-0.075	0.07	-0.007	-0.732	-1.385	-0.743	-1.165
RNF169	0.053	0.093	-0.197	-0.014	-0.859	-0.928	-0.107	-0.362
RNF17	-0.13	0.034	-0.059	0.041	-0.316	-0.911	-0.365	-1.04
RNF170	-0.054	-0.02	-0.108	-0.017	-0.99	-0.887	-0.97	-0.521
RNF175	-0.12	-0.022	0.011	-0.077	-0.395	-0.52	-0.703	-0.483
RNF180	0.035	-0.095	0.264	0.121	-0.901	-0.573	-4.122	-2.293
RNF181	-0.151	0.006	0.042	0.065	-0.353	-0.548	-0.855	-1.427
RNF182	-0.061	-0.166	0.14	-0.091	-0.404	-0.458	-1.566	-1.019
RNF183	-0.295	-0.028	0.073	0.101	-0.245	-0.338	-1.254	-1.205
RNF185	-0.151	-0.072	-0.122	-0.127	-0.546	-0.798	-0.998	-1.276
RNF186	-0.062	-0.1	0.095	0.061	-0.273	-0.577	-1.412	-1.236
RNF187	-0.219	-0.013	-0.01	0.234	-0.191	-1.367	-1.32	-3.105
RNF19A	-0.128	-0.057	-0.122	-0.115	-0.827	-0.629	-0.501	-0.318
RNF19B	-0.005	-0.138	-0.007	0.032	-1.084	-0.471	-1.281	-0.666
RNF2	-0.007	0.023	0.187	0.071	-0.591	-0.621	-1.402	-1.086
RNF20	-0.037	0.021	-0.408	-0.324	-0.392	-1.359	-0.142	-1.115
RNF207	0.03	0.019	-0.021	0.11	-0.54	-0.747	-0.649	-1.646
RNF208	0.15	0.286	-0.194	0.219	-1.409	-2.969	-0.12	-2.046
RNF212	-0.107	0.017	-0.208	-0.121	-0.813	-0.804	-0.298	-0.295
RNF213	-0.014	0.191	-0.237	-0.048	-0.704	-2.396	-0.551	-0.377
RNF214	0.147	0.161	-0.168	0.044	-1.454	-2.623	-0.572	-0.707
RNF215	0.028	-0.117	-0.126	-0.192	-0.918	-0.349	-0.169	-0.075
RNF216	0.067	-0.019	-0.095	-0.037	-0.934	-0.51	-0.554	-0.591
RNF217	-0.155	-0.028	0.051	0.073	-0.289	-0.522	-0.879	-1.258
RNF219	0.106	0.022	-0.064	-0.026	-1.888	-0.782	-0.859	-1.704
RNF220	-0.142	-0.083	0.303	0.033	-0.354	-0.673	-2.972	-2.016
RNF223	0.07	-0.194	0.027	-0.088	-1.061	-0.501	-1.357	-0.709
RNF24	0.166	0.121	0.03	0.062	-1.766	-1.626	-0.713	-1.607
RNF25	-0.275	-0.22	-0.116	0.051	-0.287	-0.204	-0.611	-2.177
RNF26	0.12	0.104	-0.067	-0.065	-1.385	-1.024	-0.504	-0.315
RNF31	0.208	0.073	-0.125	0.031	-1.684	-0.958	-0.365	-1.353
RNF32	-0.059	-0.157	-0.043	-0.144	-0.361	-0.148	-1.045	-0.879
RNF34	-0.165	-0.104	-0.202	0.085	-0.174	-0.684	-0.398	-1.01
RNF38	-0.255	-0.051	-0.076	-0.039	-0.114	-0.472	-0.966	-0.679
RNF39	0.06	-0.285	0.231	-0.073	-0.838	-0.758	-2.894	-0.702
RNF4	-0.188	-0.121	-0.031	0.032	-0.791	-0.395	-0.951	-0.776
RNF40	0.215	0.289	-0.584	-0.057	-1.4	-2.455	-0.158	-1.233
RNF41	-0.073	0.054	0.167	-0.022	-0.768	-1.4	-1.523	-0.591
RNF43	0.32	0.02	-0.094	-0.067	-3.238	-1.007	-0.917	-0.563
RNF44	-0.162	-0.044	0.104	0.086	-0.453	-1.238	-1.116	-1.159
RNF5	0.098	-0.012	0	0.144	-1.197	-0.86	-1.103	-2.597
RNF6	-0.16	-0.172	-0.105	-0.2	-0.218	-0.102	-0.262	-0.159
RNF7	0.173	0.046	0.008	-0.084	-1.498	-1.417	-0.731	-1.01
RNF8	-0.088	-0.162	-0.028	-0.058	-1.2	-0.986	-1.479	-0.682
RNFT1	0.021	0.141	-0.065	-0.098	-0.999	-2.395	-0.641	-0.911
RNFT2	0.081	0.046	-0.028	0.002	-0.691	-1.029	-0.854	-0.627
RPA4	0.146	0.051	-0.135	0.014	-1.796	-1.157	-0.394	-0.98
RPL17	0.272	0	0.186	0	-2.504	-0.307	-2.633	-1.22
RPS15A	1.042	0	-0.642	-0.015	-5.835	-1.547	-1.111	-0.346
RPS18	0.548	0.329	-0.22	0.051	-3.425	-4.386	-0.117	-2.829
RSPRY1	-0.112	-0.094	0.038	-0.062	-0.373	-0.466	-1.364	-0.458
RTN1	0.319	0.141	-0.243	0.048	-3.443	-2.915	-0.198	-1.157
RTRAF	0.069	-0.143	0.075	0.115	-1.095	-0.354	-0.912	-1.612
SAE1	0.004	-0.526	0.06	-0.039	-0.56	-0.199	-1.431	-1.53
SAR1B	-0.116	-0.214	0.021	-0.089	-0.354	-0.101	-0.855	-0.609
SART3	-0.36	-0.052	0.219	0.372	-0.291	-0.232	-2.138	-4.677
SCGB3A1	0.076	0.072	-0.05	-0.08	-1.124	-0.756	-0.866	-1.001
SELE	-0.182	-0.199	0.089	0.041	-0.204	-0.443	-0.819	-1.003
SEMA3C	-0.062	-0.028	0.041	0.077	-0.354	-1.089	-1.926	-2.747
SEMA3F	-0.189	-0.103	-0.111	-0.02	-0.561	-0.191	-0.318	-1.667
SF3B2	0.039	0.291	0.207	0.056	-1.802	-3.367	-2.497	-0.829
SF3B3	-0.31	-0.047	0.113	-0.258	-2.462	-0.598	-3.85	-1.721
SH3RF1	-0.129	0.099	0.055	0.027	-0.305	-0.815	-0.889	-1.05
SH3RF2	-0.217	-0.039	-0.115	0.06	-0.605	-0.491	-0.95	-1.019
SH3RF3	-0.43	-0.005	0.146	0.214	-0.291	-0.864	-1.413	-3.079
SHARPIN	0.017	-0.142	0.124	0.07	-0.393	-0.434	-1.392	-0.891
SHKBP1	-0.125	-0.156	0.585	0.398	-0.738	-0.402	-7.258	-4.617
SHPRH	-0.03	-0.092	0.034	-0.055	-1.236	-0.858	-1.03	-0.676
SIAH1	-0.034	0.072	0.297	0.367	-0.754	-1.587	-2.417	-4.418
SIAH2	0.03	0.025	-0.082	0.014	-0.87	-1.244	-0.475	-1.063
SIDT1	0.212	0.027	-0.038	-0.02	-1.501	-1.125	-0.453	-0.592
SIRPD	0.022	0.173	0.052	0.052	-0.42	-1.335	-1.005	-0.796
SKP1	0.415	0.082	-0.655	-0.024	-3.249	-1.064	-0.02	-0.95
SKP2	-0.206	-0.045	0.449	-0.223	-0.673	-2.344	-5.054	-0.726
SLX4	-0.011	0.157	0.056	-0.047	-0.532	-1.273	-1.227	-1.901
SMU1	0.136	0.038	-0.021	0.014	-1.303	-1.21	-2.394	-1.606
SMURF1	0.16	-0.048	-0.005	-0.006	-2.922	-0.381	-1.737	-1.816
SMURF2	-0.116	0.207	-0.215	-0.072	-0.438	-2.754	-0.361	-0.383
SMYD3	-0.087	-0.211	-0.01	-0.036	-0.294	-0.239	-1.048	-0.772
SOCS1	0.014	-0.041	-0.126	0.044	-0.696	-0.469	-0.211	-1.056
SOCS2	-0.034	0.048	0.339	0.038	-1.189	-0.936	-2.753	-0.669
SOCS3	0.2	0.068	0.159	-0.057	-1.559	-1.417	-1.181	-0.39
SOCS4	0.297	0.034	0.044	-0.001	-4.345	-0.598	-0.778	-1.109
SOCS5	0.003	-0.134	0.187	0.188	-0.752	-0.553	-1.645	-1.731
SOCS6	-0.121	-0.048	-0.133	0.128	-0.257	-0.639	-0.535	-1.734
SOCS7	-0.027	0.115	-0.294	-0.031	-1.096	-1.12	-0.166	-0.493
SORCS3	-0.266	0.003	0.052	0.046	-0.357	-0.604	-0.971	-1.245
SOWAHC	0.026	0.106	0.072	0.215	-0.782	-0.916	-1.766	-2.285
SPATA2	-0.046	-0.042	-0.139	-0.082	-0.468	-0.822	-0.458	-0.258
SPOP	0.691	0.346	0.035	0.043	-5.114	-4.609	-0.704	-2
SPOPL	-0.078	0.061	0.042	-0.004	-0.171	-1.559	-0.845	-0.713
SPSB1	-0.28	-0.035	0.021	-0.01	-0.049	-0.26	-0.506	-1.394
SPSB2	-0.148	0.014	-0.062	0.049	-0.399	-0.517	-0.706	-0.968
SPSB3	-0.044	0.078	-0.206	-0.055	-0.697	-0.794	-0.075	-0.291
SPSB4	-0.014	0.126	0.088	0.017	-0.427	-1.148	-1.555	-0.536
SRSF3	0.155	-0.039	-0.107	-0.021	-1.691	-0.981	-0.913	-1.054
STAMBP	0.038	-0.059	-0.364	-0.415	-0.705	-0.463	-0.198	-0.06
STAMBPL1	-0.131	-0.026	0.149	0.055	-0.335	-0.244	-1.948	-1.185
STUB1	0.173	-0.098	-0.035	0.033	-1.335	-0.517	-0.285	-1.184
SULT1A1	-0.016	-0.105	-0.161	-0.033	-1.132	-0.631	-0.277	-1.021
SYNE2	0.34	-0.047	-0.114	-0.135	-4.869	-0.361	-0.424	-0.334
SYP	0.082	-0.056	-0.195	-0.19	-0.857	-0.597	-0.629	-0.273
SYVN1	0.223	0.132	-0.13	-0.104	-1.674	-2.042	-0.637	-0.171
TACR1	-0.126	0.013	0.064	0.007	-0.313	-0.98	-0.973	-0.824
TAF1D	-0.235	-0.088	0.169	-0.023	-0.412	-0.333	-1.812	-2.473
TCEAL1	0.262	0.099	-0.163	0.039	-2.336	-1.346	-1.001	-0.658
TCEAL4	0.001	-0.066	-0.057	-0.129	-1.032	-0.728	-0.272	-0.238
TMEM168	-0.138	-0.089	-0.032	0.019	-0.548	-0.834	-0.927	-0.622
TMEM189	-0.055	0.313	-0.273	-0.063	-0.513	-2.47	-0.195	-0.897
TMEM189-UBE2V1	-0.137	-0.09	-0.022	-0.051	-0.845	-0.659	-0.694	-0.278
TMPRSS11D	-0.033	-0.058	-0.101	-0.035	-0.647	-1.403	-0.794	-0.464
TNFAIP1	0.136	0.187	-0.229	0.01	-0.934	-1.616	-0.143	-1.066
TNFAIP3	-0.071	0.009	0.096	0.154	-0.428	-1.314	-0.845	-2.35
TOPORS	-0.173	-0.075	0.021	-0.07	-0.221	-0.484	-0.685	-0.671
TOR1AIP1	0.087	-0.073	0.17	0.05	-0.923	-0.542	-1.733	-0.961
TOR1AIP2	-0.068	-0.142	0.16	0.076	-0.618	-0.955	-3.685	-1.868
TRAF2	0.231	-0.306	0.253	-0.021	-1.556	-0.075	-2.034	-1.31
TRAF3	-0.036	-0.042	0.179	0.217	-0.601	-0.25	-2.661	-2.903
TRAF4	0.118	0.232	-0.201	-0.167	-1.952	-2.763	-0.441	-0.337
TRAF5	0.017	0.011	0.125	0.096	-1.382	-0.831	-1.492	-1.875
TRAF6	0.237	0.188	-0.25	-0.134	-1.724	-1.62	-0.352	-0.603
TRAF7	0.006	0.092	-0.317	0.057	-1.006	-0.872	-0.578	-0.746
TRAIP	-0.226	-0.006	-0.051	0.09	-0.07	-1.648	-0.64	-1.77
TRIM10	-0.198	-0.083	0.153	0.039	-0.556	-0.771	-1.783	-0.775
TRIM11	-0.123	-0.161	0.137	0.167	-0.502	-0.356	-2.024	-2.128
TRIM13	-0.005	-0.036	-0.076	-0.043	-0.581	-0.218	-0.651	-0.361
TRIM14	-0.21	-0.083	-0.192	0.034	-0.175	-1.086	-0.232	-0.674
TRIM15	-0.259	-0.012	0.16	0.103	-0.499	-1.275	-1.741	-1.345
TRIM17	-0.257	-0.018	0.157	0.05	-0.634	-0.514	-1.811	-1.945
TRIM2	-0.182	0.038	0.041	-0.1	-0.498	-0.632	-0.8	-0.749
TRIM21	-0.021	-0.01	-0.022	-0.133	-0.807	-0.721	-0.398	-0.672
TRIM22	-0.019	0.051	-0.016	-0.138	-0.743	-0.665	-0.404	-0.411
TRIM23	-0.195	-0.174	0.114	0.083	-0.17	-0.225	-1.367	-1.737
TRIM24	-0.129	-0.1	0.037	-0.077	-0.188	-0.386	-1.056	-0.455
TRIM25	0.254	0.028	-0.241	-0.005	-1.711	-0.66	-0.224	-0.46
TRIM26	-0.147	-0.145	0.429	0.122	-0.713	-0.406	-4.644	-1.098
TRIM27	0.007	-0.035	0.211	0.004	-0.439	-0.261	-1.426	-0.878
TRIM28	-0.164	0.415	0.431	0.029	-0.25	-4.466	-4.075	-1.586
TRIM3	0.129	0.147	-0.081	-0.194	-0.847	-1.372	-1.159	-0.324
TRIM31	-0.057	0.041	0.103	0.176	-0.325	-0.737	-1.972	-1.777
TRIM32	-0.155	-0.094	-0.064	0.137	-0.618	-0.227	-1.106	-1.447
TRIM33	-0.083	-0.051	0.095	-0.021	-0.276	-0.479	-0.88	-0.564
TRIM34	0.035	0.084	-0.067	-0.035	-0.829	-0.935	-0.756	-0.329
TRIM35	0.023	0.056	0.051	-0.033	-0.88	-0.862	-0.91	-0.802
TRIM36	0.06	-0.083	0.072	-0.055	-1.828	-0.37	-2.748	-0.92
TRIM37	0.015	-0.094	0.042	-0.406	-0.741	-0.165	-2.02	-0.275
TRIM38	-0.326	-0.057	0.114	-0.071	-0.31	-0.283	-1.174	-0.463
TRIM39	-0.089	-0.176	0.244	0.146	-0.336	-0.178	-2.58	-1.494
TRIM4	-0.253	-0.075	0.232	0.082	-0.493	-0.295	-1.734	-1.47
TRIM40	-0.072	-0.034	0.039	0.139	-0.273	-1.121	-0.898	-2.798
TRIM41	-0.172	-0.209	0.115	0.057	-0.305	-0.291	-1.202	-0.705
TRIM42	0.041	0.069	-0.126	-0.005	-0.913	-1.112	-0.366	-0.824
TRIM43	-0.143	0.012	0.451	0.086	-0.121	-0.628	-3.636	-1.436
TRIM45	0.023	-0.087	0.35	-0.024	-0.824	-0.161	-4.252	-1.524
TRIM46	-0.026	-0.062	0.137	0.16	-0.822	-0.262	-1.261	-1.923
TRIM47	0.18	0.181	-0.149	-0.154	-1.491	-2.178	-0.094	-1.134
TRIM48	0.349	0.458	-0.062	-0.224	-4.764	-3.73	-0.952	-0.074
TRIM49	0.324	0.22	-0.072	-0.254	-2.43	-2.334	-0.5	-0.042
TRIM49B	0.356	0.19	-0.073	-0.113	-2.528	-1.649	-0.445	-0.248
TRIM49D1	0.46	0.645	-0.154	-0.099	-2.712	-5.57	-0.187	-0.229
TRIM5	0.084	0.006	-0.071	-0.099	-0.852	-0.714	-0.552	-0.477
TRIM50	-0.323	-0.059	-0.007	0.168	-1.153	-0.596	-0.858	-2.72
TRIM51	0.624	0.342	-0.281	-0.236	-4.526	-4.106	-0.557	-0.445
TRIM52	0.121	-0.033	-0.019	-0.01	-0.973	-0.89	-0.805	-1.578
TRIM54	-0.125	-0.016	-0.164	0.045	-0.797	-0.799	-0.584	-1.309
TRIM55	0.114	-0.036	-0.032	-0.059	-1.334	-0.884	-1.35	-0.492
TRIM56	-0.023	-0.075	0.06	-0.148	-0.71	-1.986	-0.634	-2.763
TRIM58	-0.252	-0.07	-0.088	-0.002	-0.423	-0.56	-0.578	-0.967
TRIM59	0.08	-0.152	-0.083	-0.065	-0.988	-0.389	-0.392	-1.046
TRIM6	-0.082	0.141	-0.032	-0.059	-0.583	-1.549	-0.822	-0.551
TRIM60	0.097	0.055	-0.003	-0.044	-0.879	-0.666	-0.607	-0.323
TRIM61	0.01	-0.005	-0.157	-0.152	-1.336	-0.94	-0.952	-0.426
TRIM62	-0.13	-0.066	0.16	0.139	-0.396	-1.069	-1.764	-1.579
TRIM63	-0.07	0.011	0.062	0.062	-0.434	-0.98	-1.156	-2.481
TRIM64	0.379	0.346	-0.069	-0.269	-3.731	-3.556	-0.849	-0.142
TRIM65	-0.108	0.086	-0.298	-0.139	-0.67	-0.892	-0.3	-0.298
TRIM67	-0.218	-0.038	0.197	0.167	-0.363	-0.456	-2.36	-2.135
TRIM68	0.152	0.091	-0.03	-0.129	-1.618	-0.776	-0.474	-0.313
TRIM69	-0.056	0.248	-0.14	-0.173	-0.591	-2.121	-0.553	-0.314
TRIM6-TRIM34	-0.08	0.149	-0.071	-0.128	-0.463	-1.239	-0.73	-0.708
TRIM7	0.034	-0.012	0.09	-0.011	-1.825	-0.451	-1.838	-0.835
TRIM71	-0.222	0.035	0.043	0.179	-0.279	-1.254	-0.787	-2.903
TRIM72	-0.062	-0.084	0.002	-0.065	-0.416	-0.392	-0.786	-0.245
TRIM73	-0.125	-0.105	0.155	0.052	-0.429	-0.313	-1.551	-0.696
TRIM77	0.196	0.174	-0.258	-0.066	-1.74	-1.727	-0.439	-0.413
TRIM8	-0.384	-0.108	-0.055	0.011	-0.208	-0.501	-0.445	-1.264
TRIM9	0.155	-0.019	-0.146	-0.02	-2.374	-0.478	-0.306	-1.307
TRIML1	-0.063	-0.179	-0.009	-0.102	-2.049	-0.348	-1.574	-0.641
TRIP12	0.339	0.385	-0.396	-0.48	-2.546	-3.346	-0.29	-0.088
TRPC4AP	0.018	0.018	-0.113	-0.026	-0.693	-0.809	-0.548	-0.574
TRPV6	0.021	-0.008	-0.056	0.089	-0.775	-0.508	-0.471	-1.083
TSG101	0.091	0.181	-0.722	-0.259	-1.266	-2.111	-0.069	-1.332
TSPAN13	-0.136	-0.157	0.044	0.1	-0.301	-0.106	-1.174	-2.297
TSPAN17	-0.381	-0.215	0.001	-0.097	-0.046	-0.485	-0.387	-0.188
TTBK1	-0.224	-0.002	-0.018	0.261	-0.363	-0.347	-1.261	-2.453
TTC3	-0.072	-0.036	0.007	0.02	-1.323	-0.497	-0.815	-1.212
TULP4	-0.119	-0.073	-0.003	0.041	-0.2	-0.993	-1.088	-1.842
UBA1	1.19	0.588	-0.478	-0.342	-9.205	-6.272	-0.076	-1.287
UBA2	-0.343	0.012	-0.088	-0.196	-0.255	-3.087	-1.048	-0.7
UBA3	1.531	0.53	-0.931	-0.649	-14.077	-4.238	-0.717	-1.447
UBA5	-0.001	0.093	0.097	0.112	-0.851	-1.391	-1.184	-1.837
UBA6	-0.047	-0.062	0.133	-0.024	-0.35	-0.468	-3.661	-0.921
UBA7	-0.142	-0.079	-0.003	-0.06	-0.357	-0.391	-0.369	-0.204
UBE2A	0.587	0.59	-0.526	-0.464	-5.286	-5.167	-0.049	-0.034
UBE2B	-0.21	0.006	-0.045	0.081	-0.43	-0.831	-1.383	-1.204
UBE2C	0.027	0.612	-0.231	-0.078	-1.173	-7.147	-0.176	-0.309
UBE2D1	-0.049	0.105	0.096	0.05	-0.661	-1.079	-1.329	-1.09
UBE2D2	0.07	0.098	-0.089	0.019	-0.969	-1.108	-0.277	-0.555
UBE2D3	0.416	0.229	-0.494	-0.424	-5.503	-2.025	-0.152	-0.095
UBE2D4	-0.098	-0.126	-0.129	0.103	-0.757	-0.67	-0.496	-1.994
UBE2E2	-0.075	-0.049	-0.039	0.075	-1.464	-0.262	-0.638	-1.551
UBE2E3	0.199	-0.161	0.251	0.034	-1.483	-0.41	-2.459	-0.616
UBE2F	0.11	0.133	-0.136	0.004	-1.967	-4.127	-0.507	-1.213
UBE2G1	0.26	-0.19	0.141	0.156	-1.632	-0.139	-1.528	-1.989
UBE2G2	0.015	-0.162	0.102	0.242	-0.425	-0.098	-1.051	-2.624
UBE2H	0.051	0.009	-0.102	-0.359	-0.737	-0.605	-0.281	-0.247
UBE2I	-0.356	-0.482	-0.596	-0.591	-0.929	-1.301	-2.22	-0.894
UBE2J1	0.057	-0.036	0.169	0.02	-1.294	-0.512	-1.284	-0.545
UBE2J2	-0.191	-0.071	-0.007	0.008	-0.829	-0.275	-0.869	-0.475
UBE2K	0.428	0.548	-0.779	-0.308	-5.476	-8.285	-0.058	-0.081
UBE2L3	0.701	0.389	0.335	0.299	-5.31	-4.176	-2.97	-4.042
UBE2L6	0.134	0.123	-0.187	-0.157	-0.873	-2.315	-0.377	-0.144
UBE2M	0.745	0.755	-0.239	-0.096	-11.187	-6.079	-0.069	-2.642
UBE2N	-0.089	-0.038	0.134	0.177	-0.417	-0.228	-1.954	-1.915
UBE2NL	0.067	0.075	0.09	0.144	-0.669	-1.71	-0.763	-1.365
UBE2O	0.151	0.302	-0.356	-0.105	-1.401	-3.597	-0.096	-0.333
UBE2Q1	-0.187	-0.208	0.406	0.253	-0.295	-0.164	-4.985	-3.869
UBE2Q2	0.165	0.156	-0.052	0.008	-1.267	-2.251	-0.857	-1.374
UBE2QL1	0.056	-0.245	0.268	0.031	-1.338	-0.548	-2.069	-1.108
UBE2R2	-0.051	-0.046	0.072	0.254	-0.278	-0.24	-0.746	-2.746
UBE2S	-0.035	0.136	0.19	0.169	-0.887	-2.785	-1.317	-1.767
UBE2T	-0.052	-0.069	-0.027	0.126	-0.863	-1.332	-0.829	-1.501
UBE2U	-0.13	0.008	0.008	0.059	-0.937	-0.672	-0.604	-1.745
UBE2V1	-0.054	-0.017	-0.066	-0.211	-1.478	-0.482	-0.446	-0.506
UBE2V2	0.123	-0.01	-0.099	-0.183	-1.784	-0.414	-0.821	-0.306
UBE2W	-0.32	-0.011	-0.02	0.191	-0.116	-0.779	-0.956	-2.485
UBE2Z	-0.008	-0.085	0.101	0.149	-1.72	-0.411	-1.34	-1.791
UBE3A	-0.024	0.144	0.102	-0.058	-0.71	-1.74	-1.48	-0.44
UBE3B	-0.112	-0.129	0.071	-0.13	-0.209	-0.427	-2	-0.929
UBE3C	0.142	0.208	-0.177	-0.198	-1.049	-3.163	-0.469	-0.283
UBE3D	-0.153	0.108	-0.076	0.046	-0.709	-0.908	-0.993	-0.894
UBE4A	0.192	0.098	-0.212	-0.077	-1.431	-0.998	-0.226	-0.798
UBE4B	0.012	0.088	-0.007	0.042	-0.781	-0.778	-0.591	-0.916
UBL4A	0.102	0.102	-0.202	-0.057	-1	-1.299	-0.237	-0.21
UBOX5	0.258	0.178	-0.289	-0.218	-2.646	-2.543	-0.207	-0.412
UBR1	0.008	0.003	-0.03	-0.033	-0.58	-0.897	-0.757	-1.101
UBR2	0.095	0.103	0.003	0.04	-0.938	-1.149	-1.605	-2.72
UBR3	-0.023	0.021	0.232	0.021	-0.601	-0.77	-2.048	-1.238
UBR4	0.357	0.273	0.156	-0.439	-2.395	-3.849	-2.977	-0.876
UBR5	1.524	1.525	-1.166	-1.198	-10.698	-15.368	-0.002	-0.012
UBR7	-0.028	0.042	0.004	-0.048	-0.511	-0.951	-0.621	-0.669
UCHL1	-0.118	0.075	-0.077	-0.078	-0.132	-0.649	-0.935	-1.02
UCHL3	0.067	0.035	-0.038	-0.012	-1.258	-1.574	-0.683	-1.565
UCHL5	-0.153	-0.136	0.219	0.201	-0.184	-0.105	-1.534	-2.982
UFC1	-0.386	-0.139	0.208	0.212	-0.035	-0.355	-2.109	-3.539
UFD1	0.309	-0.131	0.017	-0.191	-3.737	-1.92	-0.475	-0.752
UHRF1	-0.484	-0.579	0.364	-0.251	-0.084	-0.867	-3.927	-0.977
UHRF2	0.014	0.026	-0.098	0.041	-1.131	-1.17	-0.992	-1.332
UIMC1	-0.105	-0.15	0.117	-0.116	-0.559	-0.621	-2.382	-0.976
UNC5C	0.124	0.048	-0.101	-0.189	-1.692	-1.429	-0.873	-0.204
UNK	-0.054	0.187	-0.101	0.022	-0.481	-2.156	-0.318	-1.263
UNKL	0.087	0.144	-0.077	-0.001	-1.952	-2.186	-0.647	-0.88
USP1	-0.305	-0.105	0.184	-0.161	-0.303	-0.481	-3.329	-0.921
USP10	-0.135	0.036	-0.508	-0.128	-1.009	-0.733	-0.193	-0.117
USP11	0.173	-0.153	-0.015	-0.139	-1.875	-0.334	-0.489	-0.45
USP12	-0.102	0.019	0.157	0.091	-1.115	-1.049	-1.899	-1.015
USP13	0.032	0.029	0.139	-0.009	-0.678	-0.654	-1.084	-0.463
USP14	0.117	0.252	-0.118	0.111	-1.83	-2.119	-0.249	-1.426
USP15	0.109	0.042	-0.024	-0.002	-1.081	-0.848	-1.198	-1.132
USP16	-0.165	-0.022	-0.095	-0.122	-0.925	-0.587	-0.494	-0.578
USP18	0.035	0.085	-0.067	-0.01	-0.779	-1.242	-1.076	-0.384
USP19	-0.33	-0.27	0.066	-0.037	-0.081	-0.197	-0.754	-0.47
USP2	0.01	0.153	0.111	-0.12	-1.765	-1.228	-0.886	-0.48
USP20	-0.12	0.025	-0.125	-0.132	-0.233	-1.589	-0.506	-0.333
USP21	-0.16	-0.065	0.2	0.073	-0.435	-0.735	-1.714	-0.995
USP22	-0.357	-0.455	0.425	0.288	-0.129	-0.073	-4.513	-2.968
USP25	-0.335	-0.249	-0.116	-0.009	-0.293	-0.306	-0.806	-1.179
USP26	0.023	0.115	0.006	0.013	-0.714	-1.408	-0.529	-1.154
USP28	-0.049	-0.017	-0.18	-0.054	-1.071	-1.192	-0.423	-1.213
USP29	-0.318	-0.165	0.168	0.201	-0.386	-0.409	-2.173	-2.576
USP3	0.064	0.207	-0.027	-0.002	-0.989	-3.043	-0.661	-0.855
USP30	0.014	-0.069	0.035	0.06	-0.501	-0.457	-1.61	-1.157
USP32	0.136	-0.026	0.104	0.039	-1.056	-1.244	-1.264	-0.838
USP33	-0.013	-0.115	0.001	0.101	-1.145	-0.349	-0.749	-1.673
USP36	0.463	0.492	-0.756	-0.084	-4.898	-5.441	-0.062	-0.915
USP37	0.15	0.188	-0.086	-0.088	-1.683	-2.838	-0.847	-0.963
USP38	-0.076	0.029	-0.182	-0.142	-1.909	-0.921	-0.251	-0.553
USP39	-0.243	0.183	1.091	0.409	-0.196	-1.967	-13.353	-5.991
USP4	-0.05	0.018	-0.011	0.024	-0.94	-0.395	-0.735	-1.084
USP42	-0.212	-0.1	-0.033	-0.02	-0.277	-0.447	-1.345	-0.692
USP43	0.094	0.04	-0.039	0.049	-1.093	-2.439	-0.32	-1.207
USP44	-0.263	-0.135	0.039	0.046	-0.307	-0.591	-1.293	-0.956
USP45	0.04	-0.089	-0.073	0.109	-0.612	-0.302	-0.651	-1.905
USP46	-0.086	-0.11	-0.078	-0.086	-0.62	-0.811	-0.704	-0.195
USP48	0.009	0.092	-0.107	-0.099	-0.381	-1.517	-0.765	-0.462
USP49	-0.076	-0.097	0.361	0.095	-0.388	-0.411	-3.384	-1.229
USP5	1.58	0.286	-0.423	0.043	-9.654	-2.392	-0.05	-0.717
USP50	0.179	0.218	-0.099	-0.207	-1.911	-3.005	-0.617	-0.464
USP53	0.002	-0.069	-0.097	-0.053	-0.498	-0.9	-1.217	-0.72
USP7	-0.183	0.103	0.079	0.223	-0.394	-1.37	-0.97	-2.399
USP8	0.265	0.094	-0.602	-0.514	-1.903	-1.448	-0.129	-0.089
USPL1	-0.013	-0.162	0.123	0.075	-0.54	-0.533	-1.279	-1.836
VARS	0.093	-0.03	-0.066	0.049	-1.233	-1.22	-0.853	-1.328
VCP	0.877	0.422	-0.49	0.326	-6.178	-4.12	-0.825	-3.997
VCPIP1	0.088	0.123	-0.028	0.056	-1.133	-1.826	-0.834	-1.27
VHL	0.024	0.035	-0.131	0.033	-0.521	-0.94	-0.757	-1.341
VPS11	0.397	0.296	-0.35	-0.268	-3.52	-3.176	-0.191	-0.149
VPS18	0.529	0.259	-0.295	-0.463	-4.255	-4.927	-0.314	-0.143
VPS28	0.174	-0.189	-1.125	0.01	-1.885	-1.451	-0.005	-1.032
VPS41	-0.132	0.019	-0.061	-0.026	-0.634	-0.866	-0.815	-0.459
VPS8	-0.063	0.006	-0.102	-0.016	-1.614	-0.699	-0.785	-1.651
WDR20	-0.072	0.029	0.061	0.027	-0.893	-0.61	-0.767	-0.826
WDR48	-0.364	-0.167	0.374	0.189	-0.522	-0.406	-3.587	-1.867
WDSUB1	0.003	-0.066	0.379	-0.002	-0.738	-0.381	-3.439	-0.447
WDTC1	-0.138	0.001	-0.037	-0.089	-0.626	-0.32	-0.334	-0.676
WSB1	-0.026	-0.065	0.109	0.045	-0.534	-0.145	-2.726	-1.015
WSB2	-0.004	-0.035	0.161	0.032	-0.906	-1.086	-2.509	-0.851
WWP1	0.009	0.137	-0.082	0.065	-0.933	-1.5	-0.72	-0.918
WWP2	-0.145	-0.044	0.081	0.075	-0.151	-0.513	-1.104	-1.495
XIAP	0.278	0.399	-0.082	0.218	-2.415	-3.572	-0.733	-3.022
ZBTB1	0.182	-0.093	-0.047	0.064	-1.564	-0.625	-0.705	-2.145
ZBTB10	-0.083	0.022	0.178	0.195	-0.776	-0.989	-4.561	-2.648
ZBTB11	0.791	0.359	-0.105	-0.103	-7.284	-2.833	-0.563	-0.735
ZBTB12	0.03	-0.048	0.103	-0.056	-0.844	-0.381	-0.94	-0.389
ZBTB14	-0.223	-0.108	0.175	0.046	-0.316	-0.579	-1.785	-1.812
ZBTB16	0.05	-0.159	-0.27	-0.091	-0.869	-0.884	-0.278	-0.869
ZBTB17	-0.573	-0.298	0.703	0.368	-0.002	-0.635	-8.511	-4.634
ZBTB18	0.069	-0.004	0.111	0.072	-0.717	-0.601	-1.215	-1.297
ZBTB2	-0.116	0.133	0.111	0.306	-0.243	-1.041	-1.893	-6.016
ZBTB20	-0.042	0.103	0.096	-0.012	-0.279	-1.275	-0.905	-0.764
ZBTB21	-0.288	-0.088	0.214	0.011	-0.086	-0.434	-1.531	-1.045
ZBTB22	-0.281	-0.057	-0.064	0.027	-0.125	-0.471	-1.368	-0.493
ZBTB24	-0.239	-0.153	0.027	0.148	-0.246	-0.188	-1.622	-2.351
ZBTB25	-0.001	-0.09	-0.048	-0.071	-0.779	-0.435	-0.478	-0.677
ZBTB26	-0.205	-0.1	-0.072	-0.064	-0.531	-0.822	-0.589	-0.807
ZBTB3	0.206	0.054	-0.284	-0.214	-2.338	-0.996	-0.176	-0.293
ZBTB32	-0.039	-0.161	0.611	0.332	-0.284	-0.152	-8.326	-3.203
ZBTB33	0.079	0.024	-0.062	0.081	-1.028	-0.751	-0.718	-2.24
ZBTB37	-0.021	0.004	0.024	0.082	-0.311	-0.929	-0.852	-1.416
ZBTB38	0.15	0.137	-0.067	0.061	-1.939	-1.483	-0.591	-1.016
ZBTB39	-0.255	0.029	0.1	0	-0.11	-0.876	-0.868	-1.093
ZBTB4	0.057	0.206	-0.163	0.143	-1.137	-1.991	-0.253	-1.456
ZBTB40	-0.145	0.116	0.008	0.065	-0.199	-1.15	-0.457	-1.628
ZBTB41	-0.144	0.002	-0.08	0.094	-0.653	-0.561	-1.591	-1.454
ZBTB43	-0.179	0.042	-0.056	0.011	-0.627	-1.16	-0.761	-0.986
ZBTB44	-0.054	0.073	-0.127	-0.191	-0.421	-0.771	-0.666	-0.222
ZBTB45	-0.196	-0.126	0.499	0.439	-0.087	-0.207	-5.913	-7.227
ZBTB46	0.127	0.116	0.001	-0.034	-1.071	-1.107	-1.123	-0.916
ZBTB48	-0.019	0.105	0.125	0.17	-0.702	-1.58	-1.504	-3.451
ZBTB49	-0.121	0.067	0.061	-0.058	-0.263	-0.753	-1.283	-0.413
ZBTB5	-0.027	0.036	0.079	-0.096	-1.305	-1.276	-1.567	-0.905
ZBTB6	-0.161	-0.126	-0.041	-0.09	-0.085	-0.493	-0.544	-0.542
ZBTB7A	0.059	0.142	0.181	0.068	-0.943	-1.501	-1.703	-1.112
ZBTB7B	-0.272	0.05	0.303	0.126	-0.269	-0.947	-3.901	-2.372
ZBTB7C	-0.06	-0.154	-0.05	-0.03	-0.885	-0.338	-0.603	-0.43
ZBTB8A	-0.293	-0.088	0.158	0.025	-0.158	-0.645	-1.392	-1.172
ZBTB9	-0.106	-0.054	0.008	0.086	-0.275	-0.406	-0.899	-1.721
ZFAND3	-0.16	-0.11	0.089	-0.022	-0.174	-0.558	-0.967	-0.646
ZFAND4	0.025	-0.146	0.155	-0.008	-0.804	-0.749	-1.078	-1.178
ZFAND5	0.11	-0.005	0.001	0.036	-1.323	-0.846	-0.575	-0.598
ZFAND6	0.127	0.095	0.118	-0.166	-1.56	-1.889	-0.895	-0.23
ZFPL1	0.079	-0.058	-0.069	-0.142	-1.231	-0.75	-0.653	-0.606
ZNF131	0.042	-0.036	-0.029	-0.054	-1.207	-1.716	-1.242	-0.22
ZNF598	-0.31	0.046	0.078	0.139	-0.294	-0.693	-1.109	-2.785
ZNF7	0.049	0.073	-0.066	0.043	-1.402	-1.38	-0.662	-1.046
ZNF860	-0.056	-0.062	-0.141	-0.033	-1.176	-1.005	-0.459	-0.761
ZNRF1	-0.04	-0.005	-0.052	0.149	-0.518	-1.288	-0.648	-1.312
ZNRF2	0.033	-0.162	0.001	-0.199	-0.554	-0.142	-0.445	-0.18
ZNRF3	-0.101	-0.023	-0.164	-0.197	-0.523	-0.508	-0.203	-0.143
ZNRF4	-0.169	0.02	0.347	0.212	-0.31	-0.369	-2.493	-1.899
ZRANB1	0.059	0.183	0.259	0.177	-1.258	-2.362	-1.964	-2.214
ZSWIM2	-0.284	-0.084	-0.032	-0.12	-0.215	-0.76	-0.56	-0.636
